# Supplementary material for: Circulating Tumor Cell Genomic Evolution and Hormone Therapy Outcomes in Men with Metastatic Castration-Resistant Prostate Cancer
Source: Oxford University Press journal article supplement (doi:10.1158/1541-7786.mcr-20-0975), 2021-03-26
Supplement: 15417786mcr200975-sup-255188_2_supp_6926266_q4nr4t.xlsx [file 15417786mcr200975-sup-255188_2_supp_6926266_q4nr4t.xlsx]

## Sheet: Sheet1
	Genes	Sample Name	Status	Chrom	Pos	ID	Type	HOM/HET	Ref Allele	Alt Allele	Quality	Allele Frequency	HGVS(Genomic)	HGVS(Coding)	HGVS(Protein)	P-Value	Filtered Read Depth (per sample)	Mapping Quality	Effect	Category	Primary Effect	Function Class	Codon	AA	Impacted Gene	Transcript	Coding	Exon ID	SIFT Score	Conservation Score	Allele Frequency (1000G)	Clinical (dbSNP)	MAF dbSNP	Forward Ref Alleles	Reverse Ref Alleles	Forward Non-ref Alleles	Reverse Non-ref Alleles	CosmicMutationDescription	CosmicAASyntax	CosmicTumorSite	CosmicFrequency	COSMIC ID	OMIM ID
		809-1	Baseline	17	7576920		SNP	HET	G	T	255	0.423	NC_000017.10:g.7576920G>T	NM_001276697.1:c.449C>A	NP_001263626.1:p.Pro150His	1e-255	71	41	NON_SYNONYMOUS_CODING(MODERATE|MISSENSE|cCc/cAc|P150H|TP53|mRNA|CODING|NM_001276697|NM_001276697.ex.5),NON_SYNONYMOUS_CODING(MODERATE|MISSENSE|cCc/cAc|P150H|TP53|mRNA|CODING|NM_001276698|NM_001276698.ex.5),NON_SYNONYMOUS_CODING(MODERATE|MISSENSE|cCc/cAc|P150H|TP53|mRNA|CODING|NM_001276699|NM_001276699.ex.5),NON_SYNONYMOUS_CODING(MODERATE|MISSENSE|cCc/cAc|P177H|TP53|mRNA|CODING|NM_001126115|NM_001…	Category II-Default Categorization	NON_SYNONYMOUS_CODING|NM_001276697	MISSENSE	cCc/cAc	P150H	TP53	NM_001276697	CODING	NM_001276697.ex.5	0.13	5.16				20	21	16	12	Unknown,Substitution_Missense	p.?,p.P309R	liver,upper_aerodigestive_tract	0.35,0.03,0.19,0.31,0.02	c.920-10_926del17p.?,c.926C>Gp.P309R	OMIM:191170
		809-1	Baseline	17	7578194	rs879253894	SNP	HET	G	A	216	0.159	NC_000017.10:g.7578194G>A	NM_001126118.1:c.538C>T	NP_001119590.1:p.Pro180Ser	1e-216	44	41	NON_SYNONYMOUS_CODING(MODERATE|MISSENSE|Ccc/Tcc|P180S|TP53|mRNA|CODING|NM_001126118|NM_001126118.ex.5),NON_SYNONYMOUS_CODING(MODERATE|MISSENSE|Ccc/Tcc|P180S|TP53|mRNA|CODING|NM_001276695|NM_001276695.ex.6),NON_SYNONYMOUS_CODING(MODERATE|MISSENSE|Ccc/Tcc|P180S|TP53|mRNA|CODING|NM_001276696|NM_001276696.ex.6),NON_SYNONYMOUS_CODING(MODERATE|MISSENSE|Ccc/Tcc|P180S|TP53|mRNA|CODING|NM_001276760|NM_001…	Category II-Default Categorization	NON_SYNONYMOUS_CODING|NM_001126118	MISSENSE	Ccc/Tcc	P180S	TP53	NM_001126118	CODING	NM_001126118.ex.5	0	5.28		Uncertain significance		19	18	3	2	Deletion_Frameshift,Insertion_Frameshift,Insertion_In frame,Substitution_Missense,Unknown	p.Y220fs*27,p.P219fs*3,p.V218_P219insX,p.P219T,p.T211fs*28,p.?,p.P126fs*3,p.P219S	central_nervous_system,large_intestine,haematopoietic_and_lymphoid_tissue,liver,vulva,oesophagus,kidney,upper_aerodigestive_tract,soft_tissue	0.02,33.33,0.01,0.03,0.4,14.29,100.0,0.16,50.0,0.6,25.0	c.655delCp.Y220fs*27,c.654_655insGp.P219fs*3,c.654_655insNNNp.V218_P219insX,c.655C>Ap.P219T,c.631_655del25p.T211fs*28,c.252+6_252+7insGp.?,c.375_376insGp.P126fs*3,c.655C>Tp.P219S	OMIM:191170
		809-20	Baseline	17	7579524		SNP	LowAF	T	G	231	0.149	NC_000017.10:g.7579524T>G	NM_001126118.1:c.46A>C	NP_001119590.1:p.Thr16Pro	1e-231	383	41	NON_SYNONYMOUS_CODING(MODERATE|MISSENSE|Act/Cct|T16P|TP53|mRNA|CODING|NM_001126118|NM_001126118.ex.3),NON_SYNONYMOUS_CODING(MODERATE|MISSENSE|Act/Cct|T16P|TP53|mRNA|CODING|NM_001276695|NM_001276695.ex.4),NON_SYNONYMOUS_CODING(MODERATE|MISSENSE|Act/Cct|T16P|TP53|mRNA|CODING|NM_001276696|NM_001276696.ex.4),NON_SYNONYMOUS_CODING(MODERATE|MISSENSE|Act/Cct|T16P|TP53|mRNA|CODING|NM_001276760|NM_0012767…	Category II-Default Categorization	NON_SYNONYMOUS_CODING|NM_001126118	MISSENSE	Act/Cct	T16P	TP53	NM_001126118	CODING	NM_001126118.ex.3	0.28	0.676				165	161	26	29	Insertion_Frameshift	p.T55fs*9	oesophagus	0.03	c.162_163ins22p.T55fs*9	OMIM:191170
		809-33	Baseline	17	7577524		SNP	HOM	T	A	255	0.978	NC_000017.10:g.7577524T>A	NM_001126115.1:c.361A>T	NP_001119587.1:p.Thr121Ser	1e-255	319	41	NON_SYNONYMOUS_CODING(MODERATE|MISSENSE|Acc/Tcc|T121S|TP53|mRNA|CODING|NM_001126115|NM_001126115.ex.3),NON_SYNONYMOUS_CODING(MODERATE|MISSENSE|Acc/Tcc|T121S|TP53|mRNA|CODING|NM_001126116|NM_001126116.ex.3),NON_SYNONYMOUS_CODING(MODERATE|MISSENSE|Acc/Tcc|T121S|TP53|mRNA|CODING|NM_001126117|NM_001126117.ex.3),NON_SYNONYMOUS_CODING(MODERATE|MISSENSE|Acc/Tcc|T214S|TP53|mRNA|CODING|NM_001126118|NM_001…	Category II-Default Categorization	NON_SYNONYMOUS_CODING|NM_001126115	MISSENSE	Acc/Tcc	T121S	TP53	NM_001126115	CODING	NM_001126115.ex.3	0	4.62				4	3	152	158	Insertion_Frameshift,Substitution_Missense,Deletion_In frame	p.T253fs*>90,p.T253P,p.T253fs*91,p.T253A,p.T253fs*17,p.T253S,p.L252_I254delLTI,p.T253fs*93	stomach,small_intestine,ovary,skin,breast,kidney,large_intestine,haematopoietic_and_lymphoid_tissue,upper_aerodigestive_tract	0.42,0.6,0.03,0.07,0.51,0.01,0.16,0.02,0.39,0.04	c.756_757insATp.T253fs*>90,c.757A>Cp.T253P,c.756_757insATp.T253fs*91,c.757A>Gp.T253A,c.756_757insATp.T253fs*17,c.757A>Tp.T253S,c.749_757delCCATCCTCAp.L252_I254delLTI,c.756_757insATp.T253fs*93	OMIM:191170
		809-05	Progression	17	7577601		SNP	HET	G	T	255	0.268	NC_000017.10:g.7577601G>T	NM_001126118.1:c.563C>A	NP_001119590.1:p.Ser188Tyr	1e-255	71	41	NON_SYNONYMOUS_CODING(MODERATE|MISSENSE|tCt/tAt|S188Y|TP53|mRNA|CODING|NM_001126118|NM_001126118.ex.6),NON_SYNONYMOUS_CODING(MODERATE|MISSENSE|tCt/tAt|S188Y|TP53|mRNA|CODING|NM_001276695|NM_001276695.ex.7),NON_SYNONYMOUS_CODING(MODERATE|MISSENSE|tCt/tAt|S188Y|TP53|mRNA|CODING|NM_001276696|NM_001276696.ex.7),NON_SYNONYMOUS_CODING(MODERATE|MISSENSE|tCt/tAt|S188Y|TP53|mRNA|CODING|NM_001276760|NM_001…	Category II-Default Categorization	NON_SYNONYMOUS_CODING|NM_001126118	MISSENSE	tCt/tAt	S188Y	TP53	NM_001126118	CODING	NM_001126118.ex.6	0	3.43				30	22	8	9	Substitution_Missense,Deletion_Frameshift	p.S227F,p.S227Y,p.S227fs*1	skin,upper_aerodigestive_tract,ovary,breast,pancreas,large_intestine,liver,central_nervous_system	0.07,0.38,0.02,0.03,0.01,0.08	c.680C>Tp.S227F,c.680C>Ap.S227Y,c.679_680delTCp.S227fs*1	OMIM:191170
	TP53	809-07	Progression	17	7578481		SNP	HOM	G	T	255	0.994	NC_000017.10:g.7578481G>T	NM_001126118.1:c.332C>A	NP_001119590.1:p.Thr111Lys	1e-255	660	41	NON_SYNONYMOUS_CODING(MODERATE|MISSENSE|aCa/aAa|T111K|TP53|mRNA|CODING|NM_001126118|NM_001126118.ex.4),NON_SYNONYMOUS_CODING(MODERATE|MISSENSE|aCa/aAa|T111K|TP53|mRNA|CODING|NM_001276695|NM_001276695.ex.5),NON_SYNONYMOUS_CODING(MODERATE|MISSENSE|aCa/aAa|T111K|TP53|mRNA|CODING|NM_001276696|NM_001276696.ex.5),NON_SYNONYMOUS_CODING(MODERATE|MISSENSE|aCa/aAa|T111K|TP53|mRNA|CODING|NM_001276760|NM_001…	Category II-Default Categorization	NON_SYNONYMOUS_CODING|NM_001126118	MISSENSE	aCa/aAa	T111K	TP53	NM_001126118	CODING	NM_001126118.ex.4	0.01	4.52				3	1	348	304	Substitution_Missense,Deletion_Frameshift	p.T150I,p.P152fs*28,p.T150R,p.T150K	stomach,haematopoietic_and_lymphoid_tissue,large_intestine,upper_aerodigestive_tract,breast,lung	0.03,0.01,0.27,0.02	c.449C>Tp.T150I,c.448_449delACp.P152fs*28,c.449C>Gp.T150R,c.449C>Ap.T150K	OMIM:191170
		809-19	Progression	17	7577596		SNP	HET	A	T	242	0.169		NM_001126118		1e-242	2515	41	NON_SYNONYMOUS_CODING(MODERATE|MISSENSE|Tgt/Agt|C190S|TP53|mRNA|CODING|NM_001126118|NM_001126118.ex.6),NON_SYNONYMOUS_CODING(MODERATE|MISSENSE|Tgt/Agt|C190S|TP53|mRNA|CODING|NM_001276695|NM_001276695.ex.7),NON_SYNONYMOUS_CODING(MODERATE|MISSENSE|Tgt/Agt|C190S|TP53|mRNA|CODING|NM_001276696|NM_001276696.ex.7),NON_SYNONYMOUS_CODING(MODERATE|MISSENSE|Tgt/Agt|C190S|TP53|mRNA|CODING|NM_001276760|NM_001…	Category II-Default Categorization	NON_SYNONYMOUS_CODING|NM_001126118	MISSENSE	Tgt/Agt	C190S	TP53	NM_001126118	CODING	NM_001126118.ex.6	0.23	4.48				1108	982	219	200	Substitution_Missense	p.C229S,p.C229R,p.C229G	haematopoietic_and_lymphoid_tissue,upper_aerodigestive_tract,breast	0.01,0.02	c.685T>Ap.C229S,c.685T>Cp.C229R,c.685T>Gp.C229G	OMIM:191170
		809-20	Progression	17	7577543		SNP	HOM	C	T	255	0.791		NM_001126115		1e-255	43	41	NON_SYNONYMOUS_CODING(MODERATE|MISSENSE|atG/atA|M114I|TP53|mRNA|CODING|NM_001126115|NM_001126115.ex.3),NON_SYNONYMOUS_CODING(MODERATE|MISSENSE|atG/atA|M114I|TP53|mRNA|CODING|NM_001126116|NM_001126116.ex.3),NON_SYNONYMOUS_CODING(MODERATE|MISSENSE|atG/atA|M114I|TP53|mRNA|CODING|NM_001126117|NM_001126117.ex.3),NON_SYNONYMOUS_CODING(MODERATE|MISSENSE|atG/atA|M207I|TP53|mRNA|CODING|NM_001126118|NM_001…	Category II-Default Categorization	NON_SYNONYMOUS_CODING|NM_001126115	MISSENSE	atG/atA	M114I	TP53	NM_001126115	CODING	NM_001126115.ex.3	0	4.62				4	5	15	17	Substitution_Missense,Deletion_In frame	p.M246I,p.M153I,p.C238_M246delCNSSCMGGM	breast,lung,skin,haematopoietic_and_lymphoid_tissue,oesophagus,stomach,urinary_tract,upper_aerodigestive_tract,ovary,large_intestine,liver,central_nervous_system	0.04,0.3,0.23,0.54,0.07,0.24,0.03,0.39,0.27,0.26,0.31,0.95,0.33,0.51,0.28,0.01,0.15,0.12,0.32,0.69,0.02,0.19,0.44,0.36,0.38	c.738G>Ap.M246I,c.738G>Cp.M246I,c.459G>Cp.M153I,c.712_738del27p.C238_M246delCNSSCMGGM,c.738G>Tp.M246I,c.459G>Ap.M153I	OMIM:191170
		809-20	Progression	17	7577565		SNP	HET	T	C	255	0.723		NM_001126115		1e-255	47	41	NON_SYNONYMOUS_CODING(MODERATE|MISSENSE|aAc/aGc|N107S|TP53|mRNA|CODING|NM_001126115|NM_001126115.ex.3),NON_SYNONYMOUS_CODING(MODERATE|MISSENSE|aAc/aGc|N107S|TP53|mRNA|CODING|NM_001126116|NM_001126116.ex.3),NON_SYNONYMOUS_CODING(MODERATE|MISSENSE|aAc/aGc|N107S|TP53|mRNA|CODING|NM_001126117|NM_001126117.ex.3),NON_SYNONYMOUS_CODING(MODERATE|MISSENSE|aAc/aGc|N200S|TP53|mRNA|CODING|NM_001126118|NM_001…	Category II-Default Categorization	NON_SYNONYMOUS_CODING|NM_001126115	MISSENSE	aAc/aGc	N107S	TP53	NM_001126115	CODING	NM_001126115.ex.3	0	4.62				5	8	15	17	Substitution_Missense	p.N239S,p.N146S,p.N239T,p.N239I,p.N146T	central_nervous_system,upper_aerodigestive_tract,kidney,lung,ovary,large_intestine,pancreas,endometrium,haematopoietic_and_lymphoid_tissue,liver,oesophagus,urinary_tract,stomach,vulva,breast,salivary_gland,soft_tissue	0.02,0.55,3.03,0.22,0.67,0.24,1.01,1.04,1.52,0.27,0.03,0.16,0.06,1.02,0.85,0.4,0.19,0.01,0.39,0.3,0.51,0.42,0.13,0.15,0.34,0.35,1.49,1.47,0.21,0.11,0.08,0.37,0.04,2.17,0.52,0.63,1.41,0.25,1.64,0.69,0.23,0.28,0.71,0.2,0.31,3.7,0.54,0.78	c.716A>Gp.N239S,c.437A>Gp.N146S,c.716A>Cp.N239T,c.716A>Tp.N239I,c.437A>Cp.N146T	OMIM:191170
		809-20	Progression	17	7577576		SNP	HOM	G	C	255	0.767		NM_001126115		1e-255	43	41	NON_SYNONYMOUS_CODING(MODERATE|MISSENSE|aaC/aaG|N103K|TP53|mRNA|CODING|NM_001126115|NM_001126115.ex.3),NON_SYNONYMOUS_CODING(MODERATE|MISSENSE|aaC/aaG|N103K|TP53|mRNA|CODING|NM_001126116|NM_001126116.ex.3),NON_SYNONYMOUS_CODING(MODERATE|MISSENSE|aaC/aaG|N103K|TP53|mRNA|CODING|NM_001126117|NM_001126117.ex.3),NON_SYNONYMOUS_CODING(MODERATE|MISSENSE|aaC/aaG|N196K|TP53|mRNA|CODING|NM_001126118|NM_001…	Category II-Default Categorization	NON_SYNONYMOUS_CODING|NM_001126115	MISSENSE	aaC/aaG	N103K	TP53	NM_001126115	CODING	NM_001126115.ex.3	0.12	-2.46				2	8	14	17	Deletion_Frameshift,Deletion_In frame,Substitution_Missense,Complex_insertion inframe	p.Y234fs*11,p.Y141fs*11,p.N235delN,p.N235M,p.N235>XX	central_nervous_system,biliary_tract,breast,large_intestine,oesophagus	0.35,0.25,0.38,0.02,0.12,0.01,0.03	c.699_705delCTACAACp.Y234fs*11,c.420_426delCTACAACp.Y141fs*11,c.703_705delAACp.N235delN,c.704_705AC>TGp.N235M,c.704_705insNNNp.N235>XX	OMIM:191170
		809-33	Progression	17	7577526	rs121912653	SNP	HET	A	T	255	0.465	NC_000017.10:g.7577526A>T	NM_001126115.1:c.359T>A	NP_001119587.1:p.Leu120His	1e-255	43	41	NON_SYNONYMOUS_CODING(MODERATE|MISSENSE|cTc/cAc|L120H|TP53|mRNA|CODING|NM_001126115|NM_001126115.ex.3),NON_SYNONYMOUS_CODING(MODERATE|MISSENSE|cTc/cAc|L120H|TP53|mRNA|CODING|NM_001126116|NM_001126116.ex.3),NON_SYNONYMOUS_CODING(MODERATE|MISSENSE|cTc/cAc|L120H|TP53|mRNA|CODING|NM_001126117|NM_001126117.ex.3),NON_SYNONYMOUS_CODING(MODERATE|MISSENSE|cTc/cAc|L213H|TP53|mRNA|CODING|NM_001126118|NM_001…	Category II-Default Categorization	NON_SYNONYMOUS_CODING|NM_001126115	MISSENSE	cTc/cAc	L120H	TP53	NM_001126115	CODING	NM_001126115.ex.3	0	4.62				12	11	5	4	Substitution_Missense	p.L252P,p.L252H	breast,central_nervous_system,large_intestine,skin,lung,peritoneum,soft_tissue,stomach,upper_aerodigestive_tract	0.01,0.02,0.37,1.89,0.3,0.05,2.33,0.15,0.66,0.03,0.2,1.49,0.32,0.35,0.24,0.23,0.25,0.27,0.31,0.51,1.67,0.39,0.28	c.755T>Cp.L252P,c.755T>Ap.L252H	OMIM:191170
		809-16	Baseline	7	91625019		SNP	HET	G	A	255	0.211		NM_005751		1e-255	318	41	NON_SYNONYMOUS_CODING(MODERATE|MISSENSE|Gaa/Aaa|E279K|AKAP9|mRNA|CODING|NM_005751|NM_005751.ex.7),NON_SYNONYMOUS_CODING(MODERATE|MISSENSE|Gaa/Aaa|E279K|AKAP9|mRNA|CODING|NM_147185|NM_147185.ex.7)	Category II-Default Categorization	NON_SYNONYMOUS_CODING|NM_005751	MISSENSE	Gaa/Aaa	E279K	AKAP9	NM_005751	CODING	NM_005751.ex.7	0.05	2.82				117	134	28	37	Substitution_Nonsense	p.E291*,p.E279*	prostate	100	c.871G>Tp.E291*,c.835G>Tp.E279*	OMIM:604001
	AKAP9	809-05	Progression	7	91631434		SNP	HOM	G	A	255	0.796	NC_000007.13:g.91631434G>A	NM_005751.4:c.2203G>A	NP_005742.4:p.Glu735Lys	1e-255	93	41	NON_SYNONYMOUS_CODING(MODERATE|MISSENSE|Gaa/Aaa|E735K|AKAP9|mRNA|CODING|NM_005751|NM_005751.ex.8),NON_SYNONYMOUS_CODING(MODERATE|MISSENSE|Gaa/Aaa|E735K|AKAP9|mRNA|CODING|NM_147185|NM_147185.ex.8)	Category II-Default Categorization	NON_SYNONYMOUS_CODING|NM_005751	MISSENSE	Gaa/Aaa	E735K	AKAP9	NM_005751	CODING	NM_005751.ex.8	0.06	4.86				13	6	15	57	Substitution_Nonsense	p.E735*,p.E747*	endometrium	2.63,2.7	c.2203G>Tp.E735*,c.2239G>Tp.E747*	OMIM:604001
		809-09	Progression	7	91731987	rs750625057	SNP	LowAF	T	C	220	0.126	NC_000007.13:g.91731987T>C	NM_147185.2:c.11153T>C	NP_671714.1:p.Leu3718Pro	1e-220	334	41	NON_SYNONYMOUS_CODING(MODERATE|MISSENSE|cTg/cCg|L3718P|AKAP9|mRNA|CODING|NM_147185|NM_147185.ex.46),NON_SYNONYMOUS_CODING(MODERATE|MISSENSE|cTg/cCg|L3726P|AKAP9|mRNA|CODING|NM_005751|NM_005751.ex.46)	Category II-Default Categorization	NON_SYNONYMOUS_CODING|NM_147185	MISSENSE	cTg/cCg	L3718P	AKAP9	NM_147185	CODING	NM_147185.ex.46	0	5.32				149	143	20	20	Substitution_Missense	p.L3726P,p.L3730P	skin	1.75,1.61	c.11177T>Cp.L3726P,c.11189T>Cp.L3730P	OMIM:604001
		809-33	Progression	7	91632416		SNP	HET	G	A	255	0.293	NC_000007.13:g.91632416G>A	NM_005751.4:c.3185G>A	NP_005742.4:p.Gly1062Glu	1e-255	92	41	NON_SYNONYMOUS_CODING(MODERATE|MISSENSE|gGa/gAa|G1062E|AKAP9|mRNA|CODING|NM_005751|NM_005751.ex.8),NON_SYNONYMOUS_CODING(MODERATE|MISSENSE|gGa/gAa|G1062E|AKAP9|mRNA|CODING|NM_147185|NM_147185.ex.8)	Category II-Default Categorization	NON_SYNONYMOUS_CODING|NM_005751	MISSENSE	gGa/gAa	G1062E	AKAP9	NM_005751	CODING	NM_005751.ex.8	0.53	-1.42				32	33	13	12	Substitution_Missense	p.G1074E,p.G1062E	breast	0.38,0.49	c.3221G>Ap.G1074E,c.3185G>Ap.G1062E	OMIM:604001
		809-20	Baseline	17	37618715		SNP	HET	G	C	255	0.464	NC_000017.10:g.37618715G>C	NM_015083.2:c.391G>C	NP_055898.1:p.Glu131Gln	1e-255	349	41	NON_SYNONYMOUS_CODING(MODERATE|MISSENSE|Gaa/Caa|E131Q|CDK12|mRNA|CODING|NM_015083|NM_015083.ex.1),NON_SYNONYMOUS_CODING(MODERATE|MISSENSE|Gaa/Caa|E131Q|CDK12|mRNA|CODING|NM_016507|NM_016507.ex.1)	Category II-Default Categorization	NON_SYNONYMOUS_CODING|NM_015083	MISSENSE	Gaa/Caa	E131Q	CDK12	NM_015083	CODING	NM_015083.ex.1	0.22	4.11				97	90	54	103	Insertion_Frameshift	p.S133fs*24	large_intestine	0.49	c.391_392insAp.S133fs*24
		809-33	Baseline	17	37618715		SNP	HOM	G	A	255	0.993	NC_000017.10:g.37618715G>A	NM_015083.2:c.391G>A	NP_055898.1:p.Glu131Lys	1e-255	724	41	NON_SYNONYMOUS_CODING(MODERATE|MISSENSE|Gaa/Aaa|E131K|CDK12|mRNA|CODING|NM_015083|NM_015083.ex.1),NON_SYNONYMOUS_CODING(MODERATE|MISSENSE|Gaa/Aaa|E131K|CDK12|mRNA|CODING|NM_016507|NM_016507.ex.1)	Category II-Default Categorization	NON_SYNONYMOUS_CODING|NM_015083	MISSENSE	Gaa/Aaa	E131K	CDK12	NM_015083	CODING	NM_015083.ex.1	0.12	4.11				2	3	213	499	Insertion_Frameshift	p.S133fs*24	large_intestine	0.49	c.391_392insAp.S133fs*24
	CDK12	809-01	Progression	17	37681018		SNP	HET	T	C	255	0.273	NC_000017.10:g.37681018T>C	NM_015083.2:c.3187T>C	NP_055898.1:p.Ser1063Pro	1e-255	388	41	NON_SYNONYMOUS_CODING(MODERATE|MISSENSE|Tcc/Ccc|S1063P|CDK12|mRNA|CODING|NM_015083|NM_015083.ex.12),NON_SYNONYMOUS_CODING(MODERATE|MISSENSE|Tcc/Ccc|S1063P|CDK12|mRNA|CODING|NM_016507|NM_016507.ex.12)	Category II-Default Categorization	NON_SYNONYMOUS_CODING|NM_015083	MISSENSE	Tcc/Ccc	S1063P	CDK12	NM_015083	CODING	NM_015083.ex.12	0.72	-2.36				102	180	46	58	Substitution_Missense	p.S1063P	pancreas	1.79	c.3187T>Cp.S1063P
		809-19	Progression	17	37618715		SNP	HOM	G	C	123	1		NM_015083		1e-123	522	41	NON_SYNONYMOUS_CODING(MODERATE|MISSENSE|Gaa/Caa|E131Q|CDK12|mRNA|CODING|NM_015083|NM_015083.ex.1),NON_SYNONYMOUS_CODING(MODERATE|MISSENSE|Gaa/Caa|E131Q|CDK12|mRNA|CODING|NM_016507|NM_016507.ex.1)	Category II-Default Categorization	NON_SYNONYMOUS_CODING|NM_015083	MISSENSE	Gaa/Caa	E131Q	CDK12	NM_015083	CODING	NM_015083.ex.1	0.22	4.11				0	0	144	373	Insertion_Frameshift	p.S133fs*24	large_intestine	0.49	c.391_392insAp.S133fs*24
		809-33	Progression	17	37618422	rs796501956	SNP	HET	G	A	240	0.174	NC_000017.10:g.37618422G>A	NM_015083.2:c.98G>A	NP_055898.1:p.Arg33Lys	1e-240	184	41	NON_SYNONYMOUS_CODING(MODERATE|MISSENSE|aGa/aAa|R33K|CDK12|mRNA|CODING|NM_015083|NM_015083.ex.1),NON_SYNONYMOUS_CODING(MODERATE|MISSENSE|aGa/aAa|R33K|CDK12|mRNA|CODING|NM_016507|NM_016507.ex.1)	Category II-Default Categorization	NON_SYNONYMOUS_CODING|NM_015083	MISSENSE	aGa/aAa	R33K	CDK12	NM_015083	CODING	NM_015083.ex.1	0.31	3.71				62	90	15	15	Substitution_Missense	p.R33K	skin	2.33	c.98G>Ap.R33K
		810-04	Progression	17	37618715		SNP	HET	G	C	255	0.375	NC_000017.10:g.37618715G>C	NM_015083.2:c.391G>C	NP_055898.1:p.Glu131Gln	1e-255	56	41	NON_SYNONYMOUS_CODING(MODERATE|MISSENSE|Gaa/Caa|E131Q|CDK12|mRNA|CODING|NM_015083|NM_015083.ex.1),NON_SYNONYMOUS_CODING(MODERATE|MISSENSE|Gaa/Caa|E131Q|CDK12|mRNA|CODING|NM_016507|NM_016507.ex.1)	Category II-Default Categorization	NON_SYNONYMOUS_CODING|NM_015083	MISSENSE	Gaa/Caa	E131Q	CDK12	NM_015083	CODING	NM_015083.ex.1	0.22	4.11				20	15	8	8	Insertion_Frameshift	p.S133fs*24	large_intestine	0.49	c.391_392insAp.S133fs*24
		810-04	Progression	17	37682239		SNP	LowAF	C	A	217	0.143	NC_000017.10:g.37682239C>A	NM_015083.2:c.3430C>A	NP_055898.1:p.Pro1144Thr	1e-217	70	41	NON_SYNONYMOUS_CODING(MODERATE|MISSENSE|Cca/Aca|P1144T|CDK12|mRNA|CODING|NM_015083|NM_015083.ex.13),NON_SYNONYMOUS_CODING(MODERATE|MISSENSE|Cca/Aca|P1144T|CDK12|mRNA|CODING|NM_016507|NM_016507.ex.13)	Category II-Default Categorization	NON_SYNONYMOUS_CODING|NM_015083	MISSENSE	Cca/Aca	P1144T	CDK12	NM_015083	CODING	NM_015083.ex.13	0.01	5.07				27	33	5	3	Substitution_Missense	p.P1144S	breast	0.38	c.3430C>Tp.P1144S
		809-05	Baseline	12	49423214		SNP	LowAF	G	T	213	0.149	NC_000012.11:g.49423214G>T	NM_003482.3:c.14045C>A	NP_003473.3:p.Thr4682Lys	1e-213	47	41	NON_SYNONYMOUS_CODING(MODERATE|MISSENSE|aCa/aAa|T4682K|KMT2D|mRNA|CODING|NM_003482|NM_003482.ex.43)	Category II-Default Categorization	NON_SYNONYMOUS_CODING|NM_003482	MISSENSE	aCa/aAa	T4682K	KMT2D	NM_003482	CODING	NM_003482.ex.43	0	4.48				25	15	4	1	Insertion_Frameshift	p.T4412fs*116,p.T4682fs*116	haematopoietic_and_lymphoid_tissue	0.29,0.36	c.13234_13235insATp.T4412fs*116,c.14044_14045insATp.T4682fs*116	OMIM:602113
		809-05	Baseline	12	49426492		SNP	HET	G	A	240	0.209	NC_000012.11:g.49426492G>A	NM_003482.3:c.11996C>T	NP_003473.3:p.Pro3999Leu	1e-240	43	41	NON_SYNONYMOUS_CODING(MODERATE|MISSENSE|cCt/cTt|P3999L|KMT2D|mRNA|CODING|NM_003482|NM_003482.ex.39)	Category II-Default Categorization	NON_SYNONYMOUS_CODING|NM_003482	MISSENSE	cCt/cTt	P3999L	KMT2D	NM_003482	CODING	NM_003482.ex.39	0	5.31				13	21	3	4	Substitution_Missense	p.P3729H,p.P3999H	pancreas	1.79,2.5	c.11186C>Ap.P3729H,c.11996C>Ap.P3999H	OMIM:602113
		809-05	Baseline	12	49447036		SNP	HET	A	G	237	0.172	NC_000012.11:g.49447036A>G	NM_003482.3:c.908T>C	NP_003473.3:p.Leu303Pro	1e-237	437	41	NON_SYNONYMOUS_CODING(MODERATE|MISSENSE|cTa/cCa|L303P|KMT2D|mRNA|CODING|NM_003482|NM_003482.ex.7)	Category II-Default Categorization	NON_SYNONYMOUS_CODING|NM_003482	MISSENSE	cTa/cCa	L303P	KMT2D	NM_003482	CODING	NM_003482.ex.7	0	5.78				188	174	39	28	Substitution_Missense	p.L303P	haematopoietic_and_lymphoid_tissue	0.13,2.27	c.908T>Cp.L303P	OMIM:602113
		809-20	Baseline	12	49432741		SNP	HOM	G	A	255	0.856	NC_000012.11:g.49432741G>A	NM_003482.3:c.8398C>T	NP_003473.3:p.Gln2800Ter	1e-255	146	41	STOP_GAINED(HIGH|NONSENSE|Cag/Tag|Q2800*|KMT2D|mRNA|CODING|NM_003482|NM_003482.ex.34)	Category I-Default Categorization	STOP_GAINED|NM_003482	NONSENSE	Cag/Tag	Q2800*	KMT2D	NM_003482	CODING	NM_003482.ex.34	0	4.42				10	11	53	70	Substitution_Nonsense	p.Q2530*,p.Q2800*	oesophagus	2.04,2.0	c.7588C>Tp.Q2530*,c.8398C>Tp.Q2800*	OMIM:602113
		809-05	Progression	12	49436030		SNP	HET	G	T	251	0.193	NC_000012.11:g.49436030G>T	NM_003482.3:c.5951C>A	NP_003473.3:p.Pro1984His	1e-251	763	41	NON_SYNONYMOUS_CODING(MODERATE|MISSENSE|cCc/cAc|P1984H|KMT2D|mRNA|CODING|NM_003482|NM_003482.ex.28)	Category II-Default Categorization	NON_SYNONYMOUS_CODING|NM_003482	MISSENSE	cCc/cAc	P1984H	KMT2D	NM_003482	CODING	NM_003482.ex.28	0	4.75				240	376	77	66	Substitution_Missense	p.P1984L,p.P1714L	haematopoietic_and_lymphoid_tissue	2.27,0.13	c.5951C>Tp.P1984L,c.5141C>Tp.P1714L	OMIM:602113
	KMT2D	809-05	Progression	12	49438604		SNP	HET	G	A	255	0.288	NC_000012.11:g.49438604G>A	NM_003482.3:c.4886C>T	NP_003473.3:p.Ser1629Phe	1e-255	146	41	NON_SYNONYMOUS_CODING(MODERATE|MISSENSE|tCt/tTt|S1629F|KMT2D|mRNA|CODING|NM_003482|NM_003482.ex.19)	Category II-Default Categorization	NON_SYNONYMOUS_CODING|NM_003482	MISSENSE	tCt/tTt	S1629F	KMT2D	NM_003482	CODING	NM_003482.ex.19	0	5.81				56	48	19	21	Substitution_Missense	p.S1629Y,p.S1356Y	liver	2.6,4.26	c.4886C>Ap.S1629Y,c.4067C>Ap.S1356Y	OMIM:602113
		809-16	Progression	12	49422739		SNP	LowAF	A	G	216	0.116	NC_000012.11:g.49422739A>G	NM_003482.3:c.14254T>C	NP_003473.3:p.Phe4752Leu	1e-216	491	41	NON_SYNONYMOUS_CODING(MODERATE|MISSENSE|Ttc/Ctc|F4752L|KMT2D|mRNA|CODING|NM_003482|NM_003482.ex.45)	Category II-Default Categorization	NON_SYNONYMOUS_CODING|NM_003482	MISSENSE	Ttc/Ctc	F4752L	KMT2D	NM_003482	CODING	NM_003482.ex.45	0	4.94				244	190	30	25	Substitution_Missense	p.F4752I,p.F4482I	skin	1.43,1.45	c.14254T>Ap.F4752I,c.13444T>Ap.F4482I	OMIM:602113
		809-16	Progression	12	49447032		SNP	HOM	T	G	255	0.986	NC_000012.11:g.49447032T>G	NM_003482.3:c.912A>C	NP_003473.3:p.Lys304Asn	1e-255	73	41	NON_SYNONYMOUS_CODING(MODERATE|MISSENSE|aaA/aaC|K304N|KMT2D|mRNA|CODING|NM_003482|NM_003482.ex.7)	Category II-Default Categorization	NON_SYNONYMOUS_CODING|NM_003482	MISSENSE	aaA/aaC	K304N	KMT2D	NM_003482	CODING	NM_003482.ex.7	0	-1.41				1	0	40	30	Deletion_Frameshift	p.K304fs*30	large_intestine	0.68,0.38	c.912delAp.K304fs*30	OMIM:602113
		809-33	Progression	12	49421026	rs753795039	SNP	HET	G	T	255	0.562	NC_000012.11:g.49421026G>T	NM_003482.3:c.14723C>A	NP_003473.3:p.Ala4908Asp	1e-255	48	41	NON_SYNONYMOUS_CODING(MODERATE|MISSENSE|gCc/gAc|A4908D|KMT2D|mRNA|CODING|NM_003482|NM_003482.ex.48)	Category II-Default Categorization	NON_SYNONYMOUS_CODING|NM_003482	MISSENSE	gCc/gAc	A4908D	KMT2D	NM_003482	CODING	NM_003482.ex.48	0	4.22				13	8	12	13	Substitution_Missense	p.A4908V,p.A4638V	haematopoietic_and_lymphoid_tissue	2.27,0.13	c.14723C>Tp.A4908V,c.13913C>Tp.A4638V	OMIM:602113
		810-04	Progression	12	49416618		SNP	HET	G	A	231	0.19	NC_000012.11:g.49416618G>A	NM_003482.3:c.16093C>T	NP_003473.3:p.Gln5365Ter	1e-231	42	41	STOP_GAINED(HIGH|NONSENSE|Cag/Tag|Q5365*|KMT2D|mRNA|CODING|NM_003482|NM_003482.ex.51),UPSTREAM(MODIFIER||||PRKAG1|mRNA|CODING|NM_001206709|),UPSTREAM(MODIFIER||||PRKAG1|mRNA|CODING|NM_001206710|),UPSTREAM(MODIFIER||||PRKAG1|mRNA|CODING|NM_002733|)	Category I-Default Categorization	STOP_GAINED|NM_003482	NONSENSE	Cag/Tag	Q5365*	KMT2D	NM_003482	CODING	NM_003482.ex.51	0	5.31				15	19	3	3	Substitution_Nonsense	p.Q5095*,p.Q5365*	haematopoietic_and_lymphoid_tissue	0.29,0.36	c.15283C>Tp.Q5095*,c.16093C>Tp.Q5365*	OMIM:602113
		809-20	Baseline	7	140481478	rs121913371	SNP	HOM	G	C	255	0.957	NC_000007.13:g.140481478G>C	NM_004333.4:c.1330C>G	NP_004324.2:p.Arg444Gly	1e-255	887	41	NON_SYNONYMOUS_CODING(MODERATE|MISSENSE|Cgg/Ggg|R444G|BRAF|mRNA|CODING|NM_004333|NM_004333.ex.11)	Category II-Default Categorization	NON_SYNONYMOUS_CODING|NM_004333	MISSENSE	Cgg/Ggg	R444G	BRAF	NM_004333	CODING	NM_004333.ex.11	0	2.83				18	20	429	418	Substitution_Missense	p.R444W	endometrium,large_intestine,skin	0.04,0.0,0.01	c.1330C>Tp.R444W	OMIM:164757
		809-1	Progression	7	140508768	rs770494089	SNP	HET	G	A	255	0.74	NC_000007.13:g.140508768G>A	NM_004333.4:c.532C>T	NP_004324.2:p.Arg178Ter	1e-255	150	41	STOP_GAINED(HIGH|NONSENSE|Cga/Tga|R178*|BRAF|mRNA|CODING|NM_004333|NM_004333.ex.4)	Category I-Default Categorization	STOP_GAINED|NM_004333	NONSENSE	Cga/Tga	R178*	BRAF	NM_004333	CODING	NM_004333.ex.4	1	5.82				25	14	55	54	Substitution_Nonsense	p.R178*	large_intestine	0	c.532C>Tp.R178*	OMIM:164757
	BRAF	809-09	Progression	7	140477801		SNP	HET	C	T	240	0.174	NC_000007.13:g.140477801C>T	NM_004333.4:c.1507G>A	NP_004324.2:p.Gly503Arg	1e-240	178	41	NON_SYNONYMOUS_CODING(MODERATE|MISSENSE|Gga/Aga|G503R|BRAF|mRNA|CODING|NM_004333|NM_004333.ex.12)	Category II-Default Categorization	NON_SYNONYMOUS_CODING|NM_004333	MISSENSE	Gga/Aga	G503R	BRAF	NM_004333	CODING	NM_004333.ex.12	0	4.96				78	69	9	20	Substitution_Missense	p.G503R	haematopoietic_and_lymphoid_tissue	0.04	c.1507G>Ap.G503R	OMIM:164757
		809-09	Progression	7	140500250		SNP	HET	G	T	255	0.339	NC_000007.13:g.140500250G>T	NM_004333.4:c.892C>A	NP_004324.2:p.His298Asn	1e-255	189	41	NON_SYNONYMOUS_CODING(MODERATE|MISSENSE|Cac/Aac|H298N|BRAF|mRNA|CODING|NM_004333|NM_004333.ex.7)	Category II-Default Categorization	NON_SYNONYMOUS_CODING|NM_004333	MISSENSE	Cac/Aac	H298N	BRAF	NM_004333	CODING	NM_004333.ex.7	0.51	5.97				65	60	30	32	Substitution_Missense	p.H298Y	oesophagus	0.13	c.892C>Tp.H298Y	OMIM:164757
		810-04	Progression	7	140500184		SNP	HET	C	G	228	0.202	NC_000007.13:g.140500184C>G	NM_004333.4:c.958G>C	NP_004324.2:p.Ala320Pro	1e-228	84	41	NON_SYNONYMOUS_CODING(MODERATE|MISSENSE|Gca/Cca|A320P|BRAF|mRNA|CODING|NM_004333|NM_004333.ex.7)	Category II-Default Categorization	NON_SYNONYMOUS_CODING|NM_004333	MISSENSE	Gca/Cca	A320P	BRAF	NM_004333	CODING	NM_004333.ex.7	0.3	5.19				34	33	5	6	Substitution_Missense	p.A320T	stomach	0.05	c.958G>Ap.A320T	OMIM:164757
	BRD4	809-04	Progression	19	15365073		SNP	HET	G	C	228	0.182	NC_000019.9:g.15365073G>C	NM_014299.2:c.2048C>G	NP_055114.1:p.Ala683Gly	1e-228	44	41	NON_SYNONYMOUS_CODING(MODERATE|MISSENSE|gCt/gGt|A683G|BRD4|mRNA|CODING|NM_014299|NM_014299.ex.11),NON_SYNONYMOUS_CODING(MODERATE|MISSENSE|gCt/gGt|A683G|BRD4|mRNA|CODING|NM_058243|NM_058243.ex.11)	Category II-Default Categorization	NON_SYNONYMOUS_CODING|NM_014299	MISSENSE	gCt/gGt	A683G	BRD4	NM_014299	CODING	NM_014299.ex.11	0.1	5.22				18	18	3	3	Substitution_Missense	p.A683V	lung	0.57,0.69	c.2048C>Tp.A683V
	SPOP	809-05	Progression	17	47696392		SNP	HET	T	C	255	0.573	NC_000017.10:g.47696392T>C	NM_001007226.1:c.431A>G	NP_001007227.1:p.Asp144Gly	1e-255	389	41	NON_SYNONYMOUS_CODING(MODERATE|MISSENSE|gAt/gGt|D144G|SPOP|mRNA|CODING|NM_001007226|NM_001007226.ex.7),NON_SYNONYMOUS_CODING(MODERATE|MISSENSE|gAt/gGt|D144G|SPOP|mRNA|CODING|NM_001007227|NM_001007227.ex.6),NON_SYNONYMOUS_CODING(MODERATE|MISSENSE|gAt/gGt|D144G|SPOP|mRNA|CODING|NM_001007228|NM_001007228.ex.5),NON_SYNONYMOUS_CODING(MODERATE|MISSENSE|gAt/gGt|D144G|SPOP|mRNA|CODING|NM_001007229|NM_001…	Category II-Default Categorization	NON_SYNONYMOUS_CODING|NM_001007226	MISSENSE	gAt/gGt	D144G	SPOP	NM_001007226	CODING	NM_001007226.ex.7	0.06	5.41				81	85	67	154	Substitution_Missense	p.D144G	large_intestine	10	c.431A>Gp.D144G
		809-33	Progression	17	47696392		SNP	LowAF	T	C	219	0.147	NC_000017.10:g.47696392T>C	NM_001007226.1:c.431A>G	NP_001007227.1:p.Asp144Gly	1e-219	68	41	NON_SYNONYMOUS_CODING(MODERATE|MISSENSE|gAt/gGt|D144G|SPOP|mRNA|CODING|NM_001007226|NM_001007226.ex.7),NON_SYNONYMOUS_CODING(MODERATE|MISSENSE|gAt/gGt|D144G|SPOP|mRNA|CODING|NM_001007227|NM_001007227.ex.6),NON_SYNONYMOUS_CODING(MODERATE|MISSENSE|gAt/gGt|D144G|SPOP|mRNA|CODING|NM_001007228|NM_001007228.ex.5),NON_SYNONYMOUS_CODING(MODERATE|MISSENSE|gAt/gGt|D144G|SPOP|mRNA|CODING|NM_001007229|NM_001…	Category II-Default Categorization	NON_SYNONYMOUS_CODING|NM_001007226	MISSENSE	gAt/gGt	D144G	SPOP	NM_001007226	CODING	NM_001007226.ex.7	0.06	5.41				29	29	4	4	Substitution_Missense	p.D144G	large_intestine	10	c.431A>Gp.D144G
		809-33	Baseline	10	89690808		SNP	HOM	C	T	255	0.995	NC_000010.10:g.89690808C>T	NM_001304717.2:c.734C>T	NP_001291646.2:p.Ala?Val	1e-255	642	41	NON_SYNONYMOUS_CODING(MODERATE|MISSENSE|gCt/gTt|A245V|PTEN|mRNA|CODING|NM_001304717|NM_001304717.ex.5),NON_SYNONYMOUS_CODING(MODERATE|MISSENSE|gCt/gTt|A72V|PTEN|mRNA|CODING|NM_000314|NM_000314.ex.4),UTR_5_PRIME(MODIFIER||||PTEN|mRNA|CODING|NM_001304718|NM_001304718.ex.3)	Category II-Default Categorization	NON_SYNONYMOUS_CODING|NM_001304717	MISSENSE	gCt/gTt	A245V	PTEN	NM_001304717	CODING	NM_001304717.ex.5		5.62				1	2	402	235	Substitution_Missense	p.A72V	liver	0.2	c.215C>Tp.A72V	OMIM:601728
		809-05	Baseline	10	89720840		SNP	HET	G	C	221	0.237	NC_000010.10:g.89720840G>C	NM_001304718.1:c.400G>C	NP_001291647.1:p.Asp134His	1e-221	173	41	NON_SYNONYMOUS_CODING(MODERATE|MISSENSE|Gac/Cac|D134H|PTEN|mRNA|CODING|NM_001304718|NM_001304718.ex.8),NON_SYNONYMOUS_CODING(MODERATE|MISSENSE|Gac/Cac|D331H|PTEN|mRNA|CODING|NM_000314|NM_000314.ex.8),NON_SYNONYMOUS_CODING(MODERATE|MISSENSE|Gac/Cac|D504H|PTEN|mRNA|CODING|NM_001304717|NM_001304717.ex.9)	Category II-Default Categorization	NON_SYNONYMOUS_CODING|NM_001304718	MISSENSE	Gac/Cac	D134H	PTEN	NM_001304718	CODING	NM_001304718.ex.8		5.37				48	84	6	13	Substitution_Missense	p.D331H	oesophagus	0.39	c.991G>Cp.D331H	OMIM:601728
		810-10	Baseline	10	89717610		SNP	HET	A	G	230	0.18	NC_000010.10:g.89717610A>G	NM_001304718.1:c.44A>G	NP_001291647.1:p.Asn15Ser	1e-230	50	41	NON_SYNONYMOUS_CODING(MODERATE|MISSENSE|aAt/aGt|N15S|PTEN|mRNA|CODING|NM_001304718|NM_001304718.ex.7),NON_SYNONYMOUS_CODING(MODERATE|MISSENSE|aAt/aGt|N212S|PTEN|mRNA|CODING|NM_000314|NM_000314.ex.7),NON_SYNONYMOUS_CODING(MODERATE|MISSENSE|aAt/aGt|N385S|PTEN|mRNA|CODING|NM_001304717|NM_001304717.ex.8)	Category II-Default Categorization	NON_SYNONYMOUS_CODING|NM_001304718	MISSENSE	aAt/aGt	N15S	PTEN	NM_001304718	CODING	NM_001304718.ex.7		5.67				20	21	4	3	Deletion_Frameshift	p.N212fs*4,p.N212fs*9	haematopoietic_and_lymphoid_tissue,endometrium	0.04,0.05	c.635_650del16p.N212fs*4,c.635delAp.N212fs*9	OMIM:601728
	PTEN	809-16	Baseline	10	89725141		SNP	HET	A	G	255	0.29		NM_001304718		1e-255	262	41	NON_SYNONYMOUS_CODING(MODERATE|MISSENSE|gAt/gGt|D178G|PTEN|mRNA|CODING|NM_001304718|NM_001304718.ex.9),NON_SYNONYMOUS_CODING(MODERATE|MISSENSE|gAt/gGt|D375G|PTEN|mRNA|CODING|NM_000314|NM_000314.ex.9),NON_SYNONYMOUS_CODING(MODERATE|MISSENSE|gAt/gGt|D548G|PTEN|mRNA|CODING|NM_001304717|NM_001304717.ex.10)	Category II-Default Categorization	NON_SYNONYMOUS_CODING|NM_001304718	MISSENSE	gAt/gGt	D178G	PTEN	NM_001304718	CODING	NM_001304718.ex.9		5.26				95	91	39	35	Substitution_Missense	p.D375G	large_intestine	0.04	c.1124A>Gp.D375G	OMIM:601728
		809-01	Progression	10	89720808		SNP	HET	T	A	255	0.444	NC_000010.10:g.89720808T>A	NM_001304718.1:c.368T>A	NP_001291647.1:p.Leu123Ter	1e-255	72	41	STOP_GAINED(HIGH|NONSENSE|tTa/tAa|L123*|PTEN|mRNA|CODING|NM_001304718|NM_001304718.ex.8),STOP_GAINED(HIGH|NONSENSE|tTa/tAa|L320*|PTEN|mRNA|CODING|NM_000314|NM_000314.ex.8),STOP_GAINED(HIGH|NONSENSE|tTa/tAa|L493*|PTEN|mRNA|CODING|NM_001304717|NM_001304717.ex.9)	Category I-Default Categorization	STOP_GAINED|NM_001304718	NONSENSE	tTa/tAa	L123*	PTEN	NM_001304718	CODING	NM_001304718.ex.8		5.37				21	19	15	15	Substitution_Missense,Substitution_Nonsense	p.L320S,p.L320*	large_intestine,endometrium,lung	0.04,0.05,0.03	c.959T>Cp.L320S,c.959T>Gp.L320*,c.959T>Ap.L320*	OMIM:601728
		810-10	Progression	10	89725111		SNP	HET	T	C	255	0.254		NM_001304718		1e-255	63	41	NON_SYNONYMOUS_CODING(MODERATE|MISSENSE|gTa/gCa|V168A|PTEN|mRNA|CODING|NM_001304718|NM_001304718.ex.9),NON_SYNONYMOUS_CODING(MODERATE|MISSENSE|gTa/gCa|V365A|PTEN|mRNA|CODING|NM_000314|NM_000314.ex.9),NON_SYNONYMOUS_CODING(MODERATE|MISSENSE|gTa/gCa|V538A|PTEN|mRNA|CODING|NM_001304717|NM_001304717.ex.10)	Category II-Default Categorization	NON_SYNONYMOUS_CODING|NM_001304718	MISSENSE	gTa/gCa	V168A	PTEN	NM_001304718	CODING	NM_001304718.ex.9		5.26				25	22	7	7	Substitution_Missense	p.V365E	large_intestine	0.04	c.1094T>Ap.V365E	OMIM:601728
		809-9	Progression	10	89725110	rs758542021	SNP	LowAF	G	T	225	0.139	NC_000010.10:g.89725110G>T	NM_001304718.1:c.502G>T	NP_001291647.1:p.Val168Leu	1e-225	216	41	NON_SYNONYMOUS_CODING(MODERATE|MISSENSE|Gta/Tta|V168L|PTEN|mRNA|CODING|NM_001304718|NM_001304718.ex.9),NON_SYNONYMOUS_CODING(MODERATE|MISSENSE|Gta/Tta|V365L|PTEN|mRNA|CODING|NM_000314|NM_000314.ex.9),NON_SYNONYMOUS_CODING(MODERATE|MISSENSE|Gta/Tta|V538L|PTEN|mRNA|CODING|NM_001304717|NM_001304717.ex.10)	Category II-Default Categorization	NON_SYNONYMOUS_CODING|NM_001304718	MISSENSE	Gta/Tta	V168L	PTEN	NM_001304718	CODING	NM_001304718.ex.9		5.26				94	92	12	16	Substitution_Missense	p.V365I	cervix	0.19	c.1093G>Ap.V365I	OMIM:601728
		809-01	Baseline	17	41228549		SNP	HET	A	G	255	0.349	NC_000017.10:g.41228549A>G	NR_027676.1:n.4576T>C		1e-255	86	41	NON_SYNONYMOUS_CODING(MODERATE|MISSENSE|Tgc/Cgc|C1526R|BRCA1|mRNA|CODING|NR_027676|NR_027676.ex.13),SYNONYMOUS_CODING(LOW|SILENT|tcT/tcC|S1433|BRCA1|mRNA|CODING|NM_007297|NM_007297.ex.12),SYNONYMOUS_CODING(LOW|SILENT|tcT/tcC|S1480|BRCA1|mRNA|CODING|NM_007294|NM_007294.ex.13),SYNONYMOUS_CODING(LOW|SILENT|tcT/tcC|S1501|BRCA1|mRNA|CODING|NM_007300|NM_007300.ex.14),SYNONYMOUS_CODING(LOW|SILENT|tcT/tc…	Category II-Default Categorization	NON_SYNONYMOUS_CODING|NR_027676	MISSENSE	Tgc/Cgc	C1526R	BRCA1	NR_027676	CODING	NR_027676.ex.13						32	24	15	13	Substitution_coding silent	p.S1480S,p.S1501S	stomach	2.0,5.26	c.4440T>Cp.S1480S,c.4503T>Cp.S1501S	OMIM:113705
		810-10	Baseline	17	41244000	rs16942	SNP	HOM	T	C	255	0.997	NC_000017.10:g.41244000T>C	NM_007297.3:c.3407A>G	NP_009228.2:p.Lys1136Arg	1e-255	366	41	INTRON(MODIFIER||||BRCA1|mRNA|CODING|NM_007298|),INTRON(MODIFIER||||BRCA1|mRNA|CODING|NM_007299|),NON_SYNONYMOUS_CODING(MODERATE|MISSENSE|aAa/aGa|K1136R|BRCA1|mRNA|CODING|NM_007297|NM_007297.ex.9),NON_SYNONYMOUS_CODING(MODERATE|MISSENSE|aAa/aGa|K1183R|BRCA1|mRNA|CODING|NM_007294|NM_007294.ex.10),NON_SYNONYMOUS_CODING(MODERATE|MISSENSE|aAa/aGa|K1183R|BRCA1|mRNA|CODING|NM_007300|NM_007300.ex.10),SY…	Category II-Default Categorization	NON_SYNONYMOUS_CODING|NM_007297	MISSENSE	aAa/aGa	K1136R	BRCA1	NM_007297	CODING	NM_007297.ex.9	1	-2.35	0.324176	Benign; Conflicting interpretations of pathogenicity; Benign; Benign; Benign; Benign	0.3526	0	1	183	180	Substitution_Missense	p.K1183R	large_intestine,haematopoietic_and_lymphoid_tissue,soft_tissue,thyroid,prostate,stomach	9.09,33.33,66.67,1.04,50.0,20.0,3.23,63.64,2.0	c.3548A>Gp.K1183R	OMIM:113705
		809-16	Baseline	17	41245825		SNP	HOM	C	G	255	0.823		NM_007297		1e-255	232	41	INTRON(MODIFIER||||BRCA1|mRNA|CODING|NM_007298|),INTRON(MODIFIER||||BRCA1|mRNA|CODING|NM_007299|),NON_SYNONYMOUS_CODING(MODERATE|MISSENSE|Gaa/Caa|E528Q|BRCA1|mRNA|CODING|NM_007297|NM_007297.ex.9),NON_SYNONYMOUS_CODING(MODERATE|MISSENSE|Gaa/Caa|E575Q|BRCA1|mRNA|CODING|NM_007294|NM_007294.ex.10),NON_SYNONYMOUS_CODING(MODERATE|MISSENSE|Gaa/Caa|E575Q|BRCA1|mRNA|CODING|NM_007300|NM_007300.ex.10),NON_S…	Category II-Default Categorization	NON_SYNONYMOUS_CODING|NM_007297	MISSENSE	Gaa/Caa	E528Q	BRCA1	NM_007297	CODING	NM_007297.ex.9	0.01	3.94		Uncertain significance		19	22	112	77	Substitution_Missense	p.E575Q	skin	5.56,2.38	c.1723G>Cp.E575Q	OMIM:113705
	BRCA1	809-33	Progression	17	41245560		SNP	HET	C	G	241	0.182	NC_000017.10:g.41245560C>G	NM_007297.3:c.1847G>C	NP_009228.2:p.Ser616Thr	1e-241	121	41	INTRON(MODIFIER||||BRCA1|mRNA|CODING|NM_007298|),INTRON(MODIFIER||||BRCA1|mRNA|CODING|NM_007299|),NON_SYNONYMOUS_CODING(MODERATE|MISSENSE|aGc/aCc|S616T|BRCA1|mRNA|CODING|NM_007297|NM_007297.ex.9),NON_SYNONYMOUS_CODING(MODERATE|MISSENSE|aGc/aCc|S663T|BRCA1|mRNA|CODING|NM_007294|NM_007294.ex.10),NON_SYNONYMOUS_CODING(MODERATE|MISSENSE|aGc/aCc|S663T|BRCA1|mRNA|CODING|NM_007300|NM_007300.ex.10),NON_S…	Category II-Default Categorization	NON_SYNONYMOUS_CODING|NM_007297	MISSENSE	aGc/aCc	S616T	BRCA1	NM_007297	CODING	NM_007297.ex.9	0.08	0.788				53	46	9	11	Substitution_Missense	p.S663N	large_intestine	0.26,2.27	c.1988G>Ap.S663N	OMIM:113705
		809-05	Progression	17	41276081		SNP	HET	T	A	244	0.194	NC_000017.10:g.41276081T>A	NR_027676.1:n.194A>T		1e-244	93	41	NON_SYNONYMOUS_CODING(MODERATE|MISSENSE|tAc/tTc|Y65F|BRCA1|mRNA|CODING|NR_027676|NR_027676.ex.2),SYNONYMOUS_CODING(LOW|SILENT|gtA/gtT|V11|BRCA1|mRNA|CODING|NM_007294|NM_007294.ex.2),SYNONYMOUS_CODING(LOW|SILENT|gtA/gtT|V11|BRCA1|mRNA|CODING|NM_007298|NM_007298.ex.1),SYNONYMOUS_CODING(LOW|SILENT|gtA/gtT|V11|BRCA1|mRNA|CODING|NM_007299|NM_007299.ex.2),SYNONYMOUS_CODING(LOW|SILENT|gtA/gtT|V11|BRCA1|…	Category II-Default Categorization	NON_SYNONYMOUS_CODING|NR_027676	MISSENSE	tAc/tTc	Y65F	BRCA1	NR_027676	CODING	NR_027676.ex.2						34	41	7	9	Insertion_Frameshift	p.Q12fs*5	ovary	0.1	c.32_33insCp.Q12fs*5	OMIM:113705
		809-20	Progression	17	41258496		SNP	HOM	T	C	123	1		NR_027676		1e-123	148	41	NON_SYNONYMOUS_CODING(MODERATE|MISSENSE|tAt/tGt|Y117C|BRCA1|mRNA|CODING|NR_027676|NR_027676.ex.4),SYNONYMOUS_CODING(LOW|SILENT|ttA/ttG|L16|BRCA1|mRNA|CODING|NM_007297|NM_007297.ex.3),SYNONYMOUS_CODING(LOW|SILENT|ttA/ttG|L63|BRCA1|mRNA|CODING|NM_007294|NM_007294.ex.4),SYNONYMOUS_CODING(LOW|SILENT|ttA/ttG|L63|BRCA1|mRNA|CODING|NM_007298|NM_007298.ex.3),SYNONYMOUS_CODING(LOW|SILENT|ttA/ttG|L63|BRCA1…	Category II-Default Categorization	NON_SYNONYMOUS_CODING|NR_027676	MISSENSE	tAt/tGt	Y117C	BRCA1	NR_027676	CODING	NR_027676.ex.4				not provided,Pathogenic,Uncertain significance		0	0	71	75	Substitution_Missense	p.L63F	ovary	6.25,1.56	c.189A>Cp.L63F	OMIM:113705
		809-20	Progression	17	41258529		SNP	HOM	G	A	123	1		NR_027676		1e-123	149	41	NON_SYNONYMOUS_CODING(MODERATE|MISSENSE|tCa/tTa|S106L|BRCA1|mRNA|CODING|NR_027676|NR_027676.ex.4),SYNONYMOUS_CODING(LOW|SILENT|ctC/ctT|L52|BRCA1|mRNA|CODING|NM_007294|NM_007294.ex.4),SYNONYMOUS_CODING(LOW|SILENT|ctC/ctT|L52|BRCA1|mRNA|CODING|NM_007298|NM_007298.ex.3),SYNONYMOUS_CODING(LOW|SILENT|ctC/ctT|L52|BRCA1|mRNA|CODING|NM_007299|NM_007299.ex.4),SYNONYMOUS_CODING(LOW|SILENT|ctC/ctT|L52|BRCA1…	Category II-Default Categorization	NON_SYNONYMOUS_CODING|NR_027676	MISSENSE	tCa/tTa	S106L	BRCA1	NR_027676	CODING	NR_027676.ex.4						0	0	64	84	Substitution_coding silent	p.L52L	lung	0.23	c.156C>Ap.L52L	OMIM:113705
		809-20	Progression	17	41258544		SNP	HOM	G	A	123	1		NR_027676		1e-123	140	41	NON_SYNONYMOUS_CODING(MODERATE|MISSENSE|gCa/gTa|A101V|BRCA1|mRNA|CODING|NR_027676|NR_027676.ex.4),SYNONYMOUS_CODING(LOW|SILENT|tgC/tgT|C47|BRCA1|mRNA|CODING|NM_007294|NM_007294.ex.4),SYNONYMOUS_CODING(LOW|SILENT|tgC/tgT|C47|BRCA1|mRNA|CODING|NM_007298|NM_007298.ex.3),SYNONYMOUS_CODING(LOW|SILENT|tgC/tgT|C47|BRCA1|mRNA|CODING|NM_007299|NM_007299.ex.4),SYNONYMOUS_CODING(LOW|SILENT|tgC/tgT|C47|BRCA1…	Category II-Default Categorization	NON_SYNONYMOUS_CODING|NR_027676	MISSENSE	gCa/gTa	A101V	BRCA1	NR_027676	CODING	NR_027676.ex.4				Pathogenic		0	0	58	81	Substitution_Missense,Substitution_coding silent	p.C47W,p.C47C	ovary,large_intestine	0.1,100.0,0.26	c.141C>Gp.C47W,c.141C>Tp.C47C	OMIM:113705
		809-01	Baseline	13	32972342		SNP	HET	C	G	255	0.31	NC_000013.10:g.32972342C>G	NM_000059.3:c.9692C>G	NP_000050.2:p.Ser3231Ter	1e-255	58	41	DOWNSTREAM(MODIFIER||||N4BP2L1|mRNA|CODING|NM_001079691|),DOWNSTREAM(MODIFIER||||N4BP2L1|mRNA|CODING|NM_001286459|),DOWNSTREAM(MODIFIER||||N4BP2L1|mRNA|CODING|NM_001286460|),DOWNSTREAM(MODIFIER||||N4BP2L1|mRNA|CODING|NM_001286461|),DOWNSTREAM(MODIFIER||||N4BP2L1|mRNA|CODING|NM_052818|),STOP_GAINED(HIGH|NONSENSE|tCa/tGa|S3231*|BRCA2|mRNA|CODING|NM_000059|NM_000059.ex.27)	Category I-Default Categorization	STOP_GAINED|NM_000059	NONSENSE	tCa/tGa	S3231*	BRCA2	NM_000059	CODING	NM_000059.ex.27	0.01	3.36				22	18	8	8	Substitution_Nonsense	p.S3231*	cervix,large_intestine	20.0,0.76,0.37	c.9692C>Ap.S3231*	OMIM:600185
		809-05	Baseline	13	32911113		SNP	HET	C	T	252	0.214	NC_000013.10:g.32911113C>T	NM_000059.3:c.2621C>T	NP_000050.2:p.Thr874Ile	1e-252	84	41	NON_SYNONYMOUS_CODING(MODERATE|MISSENSE|aCt/aTt|T874I|BRCA2|mRNA|CODING|NM_000059|NM_000059.ex.11)	Category II-Default Categorization	NON_SYNONYMOUS_CODING|NM_000059	MISSENSE	aCt/aTt	T874I	BRCA2	NM_000059	CODING	NM_000059.ex.11	0.08	3.13				36	30	9	7	Substitution_Missense	p.T874I	lung	2.04,0.23	c.2621C>Tp.T874I	OMIM:600185
		809-05	Baseline	13	32937551	rs876658755	SNP	HET	G	A	222	0.167	NC_000013.10:g.32937551G>A	NM_000059.3:c.8212G>A	NP_000050.2:p.Ala2738Thr	1e-222	48	41	NON_SYNONYMOUS_CODING(MODERATE|MISSENSE|Gct/Act|A2738T|BRCA2|mRNA|CODING|NM_000059|NM_000059.ex.18)	Category II-Default Categorization	NON_SYNONYMOUS_CODING|NM_000059	MISSENSE	Gct/Act	A2738T	BRCA2	NM_000059	CODING	NM_000059.ex.18	0.06	4.64		Uncertain significance		18	22	5	1	Substitution_Missense	p.A2738S	thyroid	9.09,33.33	c.8212G>Tp.A2738S	OMIM:600185
		809-05	Baseline	13	32972589		SNP	HET	G	C	230	0.165	NC_000013.10:g.32972589G>C	NM_000059.3:c.9939G>C	NP_000050.2:p.Lys3313Asn	1e-230	188	41	DOWNSTREAM(MODIFIER||||N4BP2L1|mRNA|CODING|NM_001079691|),DOWNSTREAM(MODIFIER||||N4BP2L1|mRNA|CODING|NM_001286459|),DOWNSTREAM(MODIFIER||||N4BP2L1|mRNA|CODING|NM_001286460|),DOWNSTREAM(MODIFIER||||N4BP2L1|mRNA|CODING|NM_001286461|),DOWNSTREAM(MODIFIER||||N4BP2L1|mRNA|CODING|NM_052818|),NON_SYNONYMOUS_CODING(MODERATE|MISSENSE|aaG/aaC|K3313N|BRCA2|mRNA|CODING|NM_000059|NM_000059.ex.27)	Category II-Default Categorization	NON_SYNONYMOUS_CODING|NM_000059	MISSENSE	aaG/aaC	K3313N	BRCA2	NM_000059	CODING	NM_000059.ex.27	0	2.99				81	76	12	14	Insertion_Frameshift	p.E3316fs*11	large_intestine	0.76,0.37	c.9939_9940insAp.E3316fs*11	OMIM:600185
	BRCA2	810-10	Baseline	13	32920972	rs773194010	SNP	HET	A	G	245	0.18	NC_000013.10:g.32920972A>G	NM_000059.3:c.6946A>G	NP_000050.2:p.Lys2316Glu	1e-245	333	41	NON_SYNONYMOUS_CODING(MODERATE|MISSENSE|Aaa/Gaa|K2316E|BRCA2|mRNA|CODING|NM_000059|NM_000059.ex.13)	Category II-Default Categorization	NON_SYNONYMOUS_CODING|NM_000059	MISSENSE	Aaa/Gaa	K2316E	BRCA2	NM_000059	CODING	NM_000059.ex.13	0.01	5.03				144	129	32	26	Substitution_Missense	p.K2316Q	endometrium	1.11,2.7	c.6946A>Cp.K2316Q	OMIM:600185
		810-4	Baseline	13	32911343		SNP	HOM	C	T	255	1	NC_000013.10:g.32911343C>T	NM_000059.3:c.2851C>T	NP_000050.2:p.Leu951Phe	1e-255	64	41	NON_SYNONYMOUS_CODING(MODERATE|MISSENSE|Ctt/Ttt|L951F|BRCA2|mRNA|CODING|NM_000059|NM_000059.ex.11)	Category II-Default Categorization	NON_SYNONYMOUS_CODING|NM_000059	MISSENSE	Ctt/Ttt	L951F	BRCA2	NM_000059	CODING	NM_000059.ex.11	0.51	-1.88				0	0	36	26	Substitution_Missense	p.L951I	large_intestine	0.76,0.37	c.2851C>Ap.L951I	OMIM:600185
		809-33	Progression	13	32906480	rs766173	SNP	HOM	A	C	255	0.958	NC_000013.10:g.32906480A>C	NM_000059.3:c.865A>C	NP_000050.2:p.Asn289His	1e-255	48	41	NON_SYNONYMOUS_CODING(MODERATE|MISSENSE|Aat/Cat|N289H|BRCA2|mRNA|CODING|NM_000059|NM_000059.ex.10)	Category II-Default Categorization	NON_SYNONYMOUS_CODING|NM_000059	MISSENSE	Aat/Cat	N289H	BRCA2	NM_000059	CODING	NM_000059.ex.10	0.06	1.73	0.0581502	Benign; Benign; Benign; Benign; Benign; Benign	0.0737	2	0	22	22	Substitution_Missense	p.N289H	soft_tissue,haematopoietic_and_lymphoid_tissue	8.7,33.33,25.0,8.33	c.865A>Cp.N289H	OMIM:600185
		809-05	Progression	13	32950831		SNP	HET	C	A	255	0.35	NC_000013.10:g.32950831C>A	NM_000059.3:c.8657C>A	NP_000050.2:p.Pro2886Gln	1e-255	712	41	NON_SYNONYMOUS_CODING(MODERATE|MISSENSE|cCa/cAa|P2886Q|BRCA2|mRNA|CODING|NM_000059|NM_000059.ex.21)	Category II-Default Categorization	NON_SYNONYMOUS_CODING|NM_000059	MISSENSE	cCa/cAa	P2886Q	BRCA2	NM_000059	CODING	NM_000059.ex.21	0.61	1.6				285	178	135	112	Substitution_Missense	p.P2886R	lung	0.23,2.04	c.8657C>Gp.P2886R	OMIM:600185
		809-9	Progression	13	32906609	rs80359778	SNP	HET	A	G	255	0.224	NC_000013.10:g.32906609A>G	NM_000059.3:c.994A>G	NP_000050.2:p.Ile332Val	1e-255	294	41	NON_SYNONYMOUS_CODING(MODERATE|MISSENSE|Att/Gtt|I332V|BRCA2|mRNA|CODING|NM_000059|NM_000059.ex.10)	Category II-Default Categorization	NON_SYNONYMOUS_CODING|NM_000059	MISSENSE	Att/Gtt	I332V	BRCA2	NM_000059	CODING	NM_000059.ex.10	0.29	-0.751				101	127	27	37	Substitution_Missense	p.I332F	stomach	3.33,3.45	c.994A>Tp.I332F	OMIM:600185
	RB1	809-01	Baseline	13	48881514		SNP	HET	A	T	224	0.154	NC_000013.10:g.48881514A>T	NM_000321.2:c.236A>T	NP_000312.2:p.Glu79Val	1e-224	78	41	NON_SYNONYMOUS_CODING(MODERATE|MISSENSE|gAg/gTg|E79V|RB1|mRNA|CODING|NM_000321|NM_000321.ex.2),UPSTREAM(MODIFIER||||LINC00441|Non-coding_transcript|NON_CODING|NR_046414|)	Category II-Default Categorization	NON_SYNONYMOUS_CODING|NM_000321	MISSENSE	gAg/gTg	E79V	RB1	NM_000321	CODING	NM_000321.ex.2	0.01	2.46				33	33	6	4	Substitution_Missense	p.E79G	large_intestine	0.34,0.72	c.236A>Gp.E79G	OMIM:614041
		810-10	Baseline	13	49033914		SNP	LowAF	T	C	213	0.115	NC_000013.10:g.49033914T>C	NM_000321.2:c.2051T>C	NP_000312.2:p.Phe684Ser	1e-213	453	41	NON_SYNONYMOUS_CODING(MODERATE|MISSENSE|tTc/tCc|F684S|RB1|mRNA|CODING|NM_000321|NM_000321.ex.20)	Category II-Default Categorization	NON_SYNONYMOUS_CODING|NM_000321	MISSENSE	tTc/tCc	F684S	RB1	NM_000321	CODING	NM_000321.ex.20	0	5.48				207	194	24	24	Deletion_Frameshift	p.F684fs*12	lung	0.11	c.2051delTp.F684fs*12	OMIM:614041
