# Supplementary material for: Circulating Tumor Cell Genomic Evolution and Hormone Therapy Outcomes in Men with Metastatic Castration-Resistant Prostate Cancer
Source: Oxford University Press journal article supplement (doi:10.1158/1541-7786.mcr-20-0975), 2021-03-26
Supplement: 15417786mcr200975-sup-255188_2_supp_6926267_qcnrct.xlsx [file 15417786mcr200975-sup-255188_2_supp_6926267_qcnrct.xlsx]

## Sheet: Sheet2
	Baseline
		809-33	809-01	809-04	809-05	809-07	810-04	809-16	810-10	809-19	809-20	809-09
	Genes	BL	BL	BL	BL	BL	BL	BL	BL	BL	BL	BL
	TP53	*	*								*
	AKAP9							*
	CDK12	*									*
	KMT2D				*						*
	BRAF										*
	SPOP
	BRD4
	PTEN	*			*			*	*
	BRCA1		*					*	*
	BRCA2		*		*		*		*
	RB1		*						*
	PFS (months)	1.54	13.08	9.63	8.44	6.47	2.5	1.45	4	9.86	2.73	2.79
	Progression
		809-33	809-01	809-04	809-05	809-07	810-04	809-16	810-10	809-19	809-20	809-09
	Genes	P	P	P	P	P	P	P	P	P	P	P
	TP53	*			*	*				*	*
	AKAP9	*			*							*
	CDK12	*	*				*			*
	KMT2D	*			*		*	*
	BRAF		*				*					*
	SPOP	*			*
	BRD4			*
	PTEN		*						*			*
	BRCA1	*			*						*
	BRCA2	*			*							*
	RB1
	BL= Baseline	P= Progression	Red= Gain	Blue= Loss	*=Mutation
