# Supplementary material for: Circulating Tumor Cell Genomic Evolution and Hormone Therapy Outcomes in Men with Metastatic Castration-Resistant Prostate Cancer
Source: Oxford University Press journal article supplement (doi:10.1158/1541-7786.mcr-20-0975), 2021-03-26
Supplement: 15417786mcr200975-sup-255188_2_supp_6926268_qznrzt.xlsx [file 15417786mcr200975-sup-255188_2_supp_6926268_qznrzt.xlsx]

## Sheet: Sheet1
	Genes	Sample Name	Status	Chrom	Pos	ID	Type	HOM/HET	Ref Allele	Alt Allele	Quality	Allele Frequency	HGVS(Genomic)	HGVS(Coding)	HGVS(Protein)	P-Value	Filtered Read Depth (per sample)	Mapping Quality	Effect	Category	Primary Effect	Function Class	Codon	AA	Impacted Gene	Transcript	Coding	Exon ID	SIFT Score	Conservation Score	Allele Frequency (1000G)	Clinical (dbSNP)	MAF dbSNP	Forward Ref Alleles	Reverse Ref Alleles	Forward Non-ref Alleles	Reverse Non-ref Alleles	CosmicMutationDescription	CosmicAASyntax	CosmicTumorSite	CosmicFrequency	COSMIC ID	OMIM ID
		809-1	Sensitive	17	7576920		SNP	HET	G	T	255	0.423	NC_000017.10:g.7576920G>T	NM_001276697.1:c.449C>A	NP_001263626.1:p.Pro150His	1e-255	71	41	NON_SYNONYMOUS_CODING(MODERATE|MISSENSE|cCc/cAc|P150H|TP53|mRNA|CODING|NM_001276697|NM_001276697.ex.5),NON_SYNONYMOUS_CODING(MODERATE|MISSENSE|cCc/cAc|P150H|TP53|mRNA|CODING|NM_001276698|NM_001276698.ex.5),NON_SYNONYMOUS_CODING(MODERATE|MISSENSE|cCc/cAc|P150H|TP53|mRNA|CODING|NM_001276699|NM_001276699.ex.5),NON_SYNONYMOUS_CODING(MODERATE|MISSENSE|cCc/cAc|P177H|TP53|mRNA|CODING|NM_001126115|NM_001…	Category II-Default Categorization	NON_SYNONYMOUS_CODING|NM_001276697	MISSENSE	cCc/cAc	P150H	TP53	NM_001276697	CODING	NM_001276697.ex.5	0.13	5.16				20	21	16	12	Unknown,Substitution_Missense	p.?,p.P309R	liver,upper_aerodigestive_tract	0.35,0.03,0.19,0.31,0.02	c.920-10_926del17p.?,c.926C>Gp.P309R	OMIM:191170
	TP53	809-1	Sensitive	17	7578194	rs879253894	SNP	HET	G	A	216	0.159	NC_000017.10:g.7578194G>A	NM_001126118.1:c.538C>T	NP_001119590.1:p.Pro180Ser	1e-216	44	41	NON_SYNONYMOUS_CODING(MODERATE|MISSENSE|Ccc/Tcc|P180S|TP53|mRNA|CODING|NM_001126118|NM_001126118.ex.5),NON_SYNONYMOUS_CODING(MODERATE|MISSENSE|Ccc/Tcc|P180S|TP53|mRNA|CODING|NM_001276695|NM_001276695.ex.6),NON_SYNONYMOUS_CODING(MODERATE|MISSENSE|Ccc/Tcc|P180S|TP53|mRNA|CODING|NM_001276696|NM_001276696.ex.6),NON_SYNONYMOUS_CODING(MODERATE|MISSENSE|Ccc/Tcc|P180S|TP53|mRNA|CODING|NM_001276760|NM_001…	Category II-Default Categorization	NON_SYNONYMOUS_CODING|NM_001126118	MISSENSE	Ccc/Tcc	P180S	TP53	NM_001126118	CODING	NM_001126118.ex.5	0	5.28		Uncertain significance		19	18	3	2	Deletion_Frameshift,Insertion_Frameshift,Insertion_In frame,Substitution_Missense,Unknown	p.Y220fs*27,p.P219fs*3,p.V218_P219insX,p.P219T,p.T211fs*28,p.?,p.P126fs*3,p.P219S	central_nervous_system,large_intestine,haematopoietic_and_lymphoid_tissue,liver,vulva,oesophagus,kidney,upper_aerodigestive_tract,soft_tissue	0.02,33.33,0.01,0.03,0.4,14.29,100.0,0.16,50.0,0.6,25.0	c.655delCp.Y220fs*27,c.654_655insGp.P219fs*3,c.654_655insNNNp.V218_P219insX,c.655C>Ap.P219T,c.631_655del25p.T211fs*28,c.252+6_252+7insGp.?,c.375_376insGp.P126fs*3,c.655C>Tp.P219S	OMIM:191170
		809-20	Resistant	17	7579524		SNP	LowAF	T	G	231	0.149	NC_000017.10:g.7579524T>G	NM_001126118.1:c.46A>C	NP_001119590.1:p.Thr16Pro	1e-231	383	41	NON_SYNONYMOUS_CODING(MODERATE|MISSENSE|Act/Cct|T16P|TP53|mRNA|CODING|NM_001126118|NM_001126118.ex.3),NON_SYNONYMOUS_CODING(MODERATE|MISSENSE|Act/Cct|T16P|TP53|mRNA|CODING|NM_001276695|NM_001276695.ex.4),NON_SYNONYMOUS_CODING(MODERATE|MISSENSE|Act/Cct|T16P|TP53|mRNA|CODING|NM_001276696|NM_001276696.ex.4),NON_SYNONYMOUS_CODING(MODERATE|MISSENSE|Act/Cct|T16P|TP53|mRNA|CODING|NM_001276760|NM_0012767…	Category II-Default Categorization	NON_SYNONYMOUS_CODING|NM_001126118	MISSENSE	Act/Cct	T16P	TP53	NM_001126118	CODING	NM_001126118.ex.3	0.28	0.676				165	161	26	29	Insertion_Frameshift	p.T55fs*9	oesophagus	0.03	c.162_163ins22p.T55fs*9	OMIM:191170
		809-33	Resistant	17	7577524		SNP	HOM	T	A	255	0.978	NC_000017.10:g.7577524T>A	NM_001126115.1:c.361A>T	NP_001119587.1:p.Thr121Ser	1e-255	319	41	NON_SYNONYMOUS_CODING(MODERATE|MISSENSE|Acc/Tcc|T121S|TP53|mRNA|CODING|NM_001126115|NM_001126115.ex.3),NON_SYNONYMOUS_CODING(MODERATE|MISSENSE|Acc/Tcc|T121S|TP53|mRNA|CODING|NM_001126116|NM_001126116.ex.3),NON_SYNONYMOUS_CODING(MODERATE|MISSENSE|Acc/Tcc|T121S|TP53|mRNA|CODING|NM_001126117|NM_001126117.ex.3),NON_SYNONYMOUS_CODING(MODERATE|MISSENSE|Acc/Tcc|T214S|TP53|mRNA|CODING|NM_001126118|NM_001…	Category II-Default Categorization	NON_SYNONYMOUS_CODING|NM_001126115	MISSENSE	Acc/Tcc	T121S	TP53	NM_001126115	CODING	NM_001126115.ex.3	0	4.62				4	3	152	158	Insertion_Frameshift,Substitution_Missense,Deletion_In frame	p.T253fs*>90,p.T253P,p.T253fs*91,p.T253A,p.T253fs*17,p.T253S,p.L252_I254delLTI,p.T253fs*93	stomach,small_intestine,ovary,skin,breast,kidney,large_intestine,haematopoietic_and_lymphoid_tissue,upper_aerodigestive_tract	0.42,0.6,0.03,0.07,0.51,0.01,0.16,0.02,0.39,0.04	c.756_757insATp.T253fs*>90,c.757A>Cp.T253P,c.756_757insATp.T253fs*91,c.757A>Gp.T253A,c.756_757insATp.T253fs*17,c.757A>Tp.T253S,c.749_757delCCATCCTCAp.L252_I254delLTI,c.756_757insATp.T253fs*93	OMIM:191170
	CDK12	809-20	Resistant	17	37618715		SNP	HET	G	C	255	0.464	NC_000017.10:g.37618715G>C	NM_015083.2:c.391G>C	NP_055898.1:p.Glu131Gln	1e-255	349	41	NON_SYNONYMOUS_CODING(MODERATE|MISSENSE|Gaa/Caa|E131Q|CDK12|mRNA|CODING|NM_015083|NM_015083.ex.1),NON_SYNONYMOUS_CODING(MODERATE|MISSENSE|Gaa/Caa|E131Q|CDK12|mRNA|CODING|NM_016507|NM_016507.ex.1)	Category II-Default Categorization	NON_SYNONYMOUS_CODING|NM_015083	MISSENSE	Gaa/Caa	E131Q	CDK12	NM_015083	CODING	NM_015083.ex.1	0.22	4.11				97	90	54	103	Insertion_Frameshift	p.S133fs*24	large_intestine	0.49	c.391_392insAp.S133fs*24
		809-33	Resistant	17	37618715		SNP	HOM	G	A	255	0.993	NC_000017.10:g.37618715G>A	NM_015083.2:c.391G>A	NP_055898.1:p.Glu131Lys	1e-255	724	41	NON_SYNONYMOUS_CODING(MODERATE|MISSENSE|Gaa/Aaa|E131K|CDK12|mRNA|CODING|NM_015083|NM_015083.ex.1),NON_SYNONYMOUS_CODING(MODERATE|MISSENSE|Gaa/Aaa|E131K|CDK12|mRNA|CODING|NM_016507|NM_016507.ex.1)	Category II-Default Categorization	NON_SYNONYMOUS_CODING|NM_015083	MISSENSE	Gaa/Aaa	E131K	CDK12	NM_015083	CODING	NM_015083.ex.1	0.12	4.11				2	3	213	499	Insertion_Frameshift	p.S133fs*24	large_intestine	0.49	c.391_392insAp.S133fs*24
	BRAF	809-20	Resistant	7	140481478	rs121913371	SNP	HOM	G	C	255	0.957	NC_000007.13:g.140481478G>C	NM_004333.4:c.1330C>G	NP_004324.2:p.Arg444Gly	1e-255	887	41	NON_SYNONYMOUS_CODING(MODERATE|MISSENSE|Cgg/Ggg|R444G|BRAF|mRNA|CODING|NM_004333|NM_004333.ex.11)	Category II-Default Categorization	NON_SYNONYMOUS_CODING|NM_004333	MISSENSE	Cgg/Ggg	R444G	BRAF	NM_004333	CODING	NM_004333.ex.11	0	2.83				18	20	429	418	Substitution_Missense	p.R444W	endometrium,large_intestine,skin	0.04,0.0,0.01	c.1330C>Tp.R444W	OMIM:164757
	PTEN	809-05	Sensitive	10	89720840		SNP	HET	G	C	221	0.237	NC_000010.10:g.89720840G>C	NM_001304718.1:c.400G>C	NP_001291647.1:p.Asp134His	1e-221	173	41	NON_SYNONYMOUS_CODING(MODERATE|MISSENSE|Gac/Cac|D134H|PTEN|mRNA|CODING|NM_001304718|NM_001304718.ex.8),NON_SYNONYMOUS_CODING(MODERATE|MISSENSE|Gac/Cac|D331H|PTEN|mRNA|CODING|NM_000314|NM_000314.ex.8),NON_SYNONYMOUS_CODING(MODERATE|MISSENSE|Gac/Cac|D504H|PTEN|mRNA|CODING|NM_001304717|NM_001304717.ex.9)	Category II-Default Categorization	NON_SYNONYMOUS_CODING|NM_001304718	MISSENSE	Gac/Cac	D134H	PTEN	NM_001304718	CODING	NM_001304718.ex.8		5.37				48	84	6	13	Substitution_Missense	p.D331H	oesophagus	0.39	c.991G>Cp.D331H	OMIM:601728
		809-33	Resistant	10	89690808		SNP	HOM	C	T	255	0.995	NC_000010.10:g.89690808C>T	NM_001304717.2:c.734C>T	NP_001291646.2:p.Ala?Val	1e-255	642	41	NON_SYNONYMOUS_CODING(MODERATE|MISSENSE|gCt/gTt|A245V|PTEN|mRNA|CODING|NM_001304717|NM_001304717.ex.5),NON_SYNONYMOUS_CODING(MODERATE|MISSENSE|gCt/gTt|A72V|PTEN|mRNA|CODING|NM_000314|NM_000314.ex.4),UTR_5_PRIME(MODIFIER||||PTEN|mRNA|CODING|NM_001304718|NM_001304718.ex.3)	Category II-Default Categorization	NON_SYNONYMOUS_CODING|NM_001304717	MISSENSE	gCt/gTt	A245V	PTEN	NM_001304717	CODING	NM_001304717.ex.5		5.62				1	2	402	235	Substitution_Missense	p.A72V	liver	0.2	c.215C>Tp.A72V	OMIM:601728
		809-16	Resistant	10	89725141		SNP	HET	A	G	255	0.29		NM_001304718		1e-255	262	41	NON_SYNONYMOUS_CODING(MODERATE|MISSENSE|gAt/gGt|D178G|PTEN|mRNA|CODING|NM_001304718|NM_001304718.ex.9),NON_SYNONYMOUS_CODING(MODERATE|MISSENSE|gAt/gGt|D375G|PTEN|mRNA|CODING|NM_000314|NM_000314.ex.9),NON_SYNONYMOUS_CODING(MODERATE|MISSENSE|gAt/gGt|D548G|PTEN|mRNA|CODING|NM_001304717|NM_001304717.ex.10)	Category II-Default Categorization	NON_SYNONYMOUS_CODING|NM_001304718	MISSENSE	gAt/gGt	D178G	PTEN	NM_001304718	CODING	NM_001304718.ex.9		5.26				95	91	39	35	Substitution_Missense	p.D375G	large_intestine	0.04	c.1124A>Gp.D375G	OMIM:601728
		809-20	Resistant	1	115258745	rs121434595	SNP	HET	C	T	249	0.207	NC_000001.10:g.115258745C>T	NM_002524.4:c.37G>A	NP_002515.1:p.Gly13Ser	1e-249	87	41	DOWNSTREAM(MODIFIER||||CSDE1|mRNA|CODING|NM_001007553|),DOWNSTREAM(MODIFIER||||CSDE1|mRNA|CODING|NM_001130523|),DOWNSTREAM(MODIFIER||||CSDE1|mRNA|CODING|NM_001242891|),DOWNSTREAM(MODIFIER||||CSDE1|mRNA|CODING|NM_001242892|),DOWNSTREAM(MODIFIER||||CSDE1|mRNA|CODING|NM_001242893|),DOWNSTREAM(MODIFIER||||CSDE1|mRNA|CODING|NM_007158|),NON_SYNONYMOUS_CODING(MODERATE|MISSENSE|Ggt/Agt|G13S|NRAS|mRNA|COD…	Category II-Default Categorization	NON_SYNONYMOUS_CODING|NM_002524	MISSENSE	Ggt/Agt	G13S	NRAS	NM_002524	CODING	NM_002524.ex.2	0.01	5.58				36	33	9	7	Substitution_Missense	p.G13S,p.G13C,p.G13R	haematopoietic_and_lymphoid_tissue,pleura,skin,autonomic_ganglia,endometrium,large_intestine,NS,soft_tissue,breast,lung,stomach,thyroid,urinary_tract,biliary_tract,salivary_gland	0.02,0.16,50.0,0.3,1.08,0.25,0.1,0.14,1.03,0.34,0.46,0.29,0.03,0.01,0.4,0.86,0.11,0.19,0.08,0.09,0.78,0.37,0.05	c.37G>Ap.G13S,c.37G>Tp.G13C,c.37G>Cp.G13R	OMIM:164790
	NRAS	809-33	Resistant	1	115256529	rs11554290	SNP	HOM	T	A	255	1	NC_000001.10:g.115256529T>A	NM_002524.4:c.182A>T	NP_002515.1:p.Gln61Leu	1e-255	109	41	DOWNSTREAM(MODIFIER||||CSDE1|mRNA|CODING|NM_001007553|),DOWNSTREAM(MODIFIER||||CSDE1|mRNA|CODING|NM_001130523|),DOWNSTREAM(MODIFIER||||CSDE1|mRNA|CODING|NM_001242891|),DOWNSTREAM(MODIFIER||||CSDE1|mRNA|CODING|NM_001242892|),DOWNSTREAM(MODIFIER||||CSDE1|mRNA|CODING|NM_001242893|),DOWNSTREAM(MODIFIER||||CSDE1|mRNA|CODING|NM_007158|),NON_SYNONYMOUS_CODING(MODERATE|MISSENSE|cAa/cTa|Q61L|NRAS|mRNA|COD…	Category II-Default Categorization	NON_SYNONYMOUS_CODING|NM_002524	MISSENSE	cAa/cTa	Q61L	NRAS	NM_002524	CODING	NM_002524.ex.3	0.01	5.08				0	0	54	53	Substitution_Missense	p.Q61R,p.Q61L,p.Q61P,p.Q61T	adrenal_gland,central_nervous_system,large_intestine,lung,meninges,pancreas,skin,soft_tissue,thyroid,urinary_tract,bone,eye,haematopoietic_and_lymphoid_tissue,liver,ovary,prostate,testis,breast,endometrium,NS,salivary_gland,stomach,autonomic_ganglia,biliary_tract,genital_tract,small_intestine,upper_aerodigestive_tract	3.0,0.11,0.33,21.43,0.46,1.3,0.03,1.03,0.21,0.61,7.55,1.01,5.26,1.13,0.02,1.17,0.17,16.67,0.2,0.04,1.96,33.33,0.08,0.22,0.58,0.23,100.0,1.52,0.89,0.73,0.5,0.35,0.99,0.43,7.02,1.37,0.83,0.37,6.79,0.15,5.97,4.93,0.36,0.78,1.0,0.82,0.4,0.29,7.14,0.59,1.15,2.63,3.79,27.56	c.182A>Gp.Q61R,c.182A>Tp.Q61L,c.182A>Cp.Q61P,c.181_182CA>ACp.Q61T,c.181_182CA>TTp.Q61L,c.181_182CA>AGp.Q61R	OMIM:164790
		809-33	Resistant	1	115256530	rs121913254	SNP	HOM	G	A	255	0.991	NC_000001.10:g.115256530G>A	NM_002524.3:c.181C>T	NP_002515.1:p.Gln61Ter	1e-255	108	41	DOWNSTREAM(MODIFIER||||CSDE1|mRNA|CODING|NM_001007553|),DOWNSTREAM(MODIFIER||||CSDE1|mRNA|CODING|NM_001130523|),DOWNSTREAM(MODIFIER||||CSDE1|mRNA|CODING|NM_001242891|),DOWNSTREAM(MODIFIER||||CSDE1|mRNA|CODING|NM_001242892|),DOWNSTREAM(MODIFIER||||CSDE1|mRNA|CODING|NM_001242893|),DOWNSTREAM(MODIFIER||||CSDE1|mRNA|CODING|NM_007158|),STOP_GAINED(HIGH|NONSENSE|Caa/Taa|Q61*|NRAS|mRNA|CODING|NM_002524|…	Category I-Default Categorization	STOP_GAINED|NM_002524	NONSENSE	Caa/Taa	Q61*	NRAS	NM_002524	CODING	NM_002524.ex.3	0.03	5.08				0	1	55	50	Substitution_Missense,Complex	p.Q61E,p.Q61K,p.G60>?	autonomic_ganglia,bone,endometrium,haematopoietic_and_lymphoid_tissue,skin,soft_tissue,thyroid,central_nervous_system,large_intestine,meninges,pleura,biliary_tract,cervix,eye,liver,lung,NS,ovary,upper_aerodigestive_tract,kidney,breast,pancreas,prostate,stomach,urinary_tract	0.36,1.01,0.5,0.33,0.04,0.01,6.73,8.66,0.34,0.87,3.03,50.0,9.93,0.15,0.08,0.39,1.72,0.56,0.02,0.17,4.15,1.64,5.33,0.43,1.03,1.81,0.21,14.29,37.5,3.19,1.05,1.22,1.4,2.74,0.9	c.181C>Gp.Q61E,c.181C>Ap.Q61K,c.180_181AC>TAp.Q61K,c.180_181AC>CAp.G60>?	OMIM:164790
