# Supplementary figures and images for: Circulating Tumor Cell Genomic Evolution and Hormone Therapy Outcomes in Men with Metastatic Castration-Resistant Prostate Cancer
Source: Oxford University Press journal article supplement (doi:10.1158/1541-7786.mcr-20-0975), 2021-03-26

1. Baseline (N=45), >40% cases had genomic gain


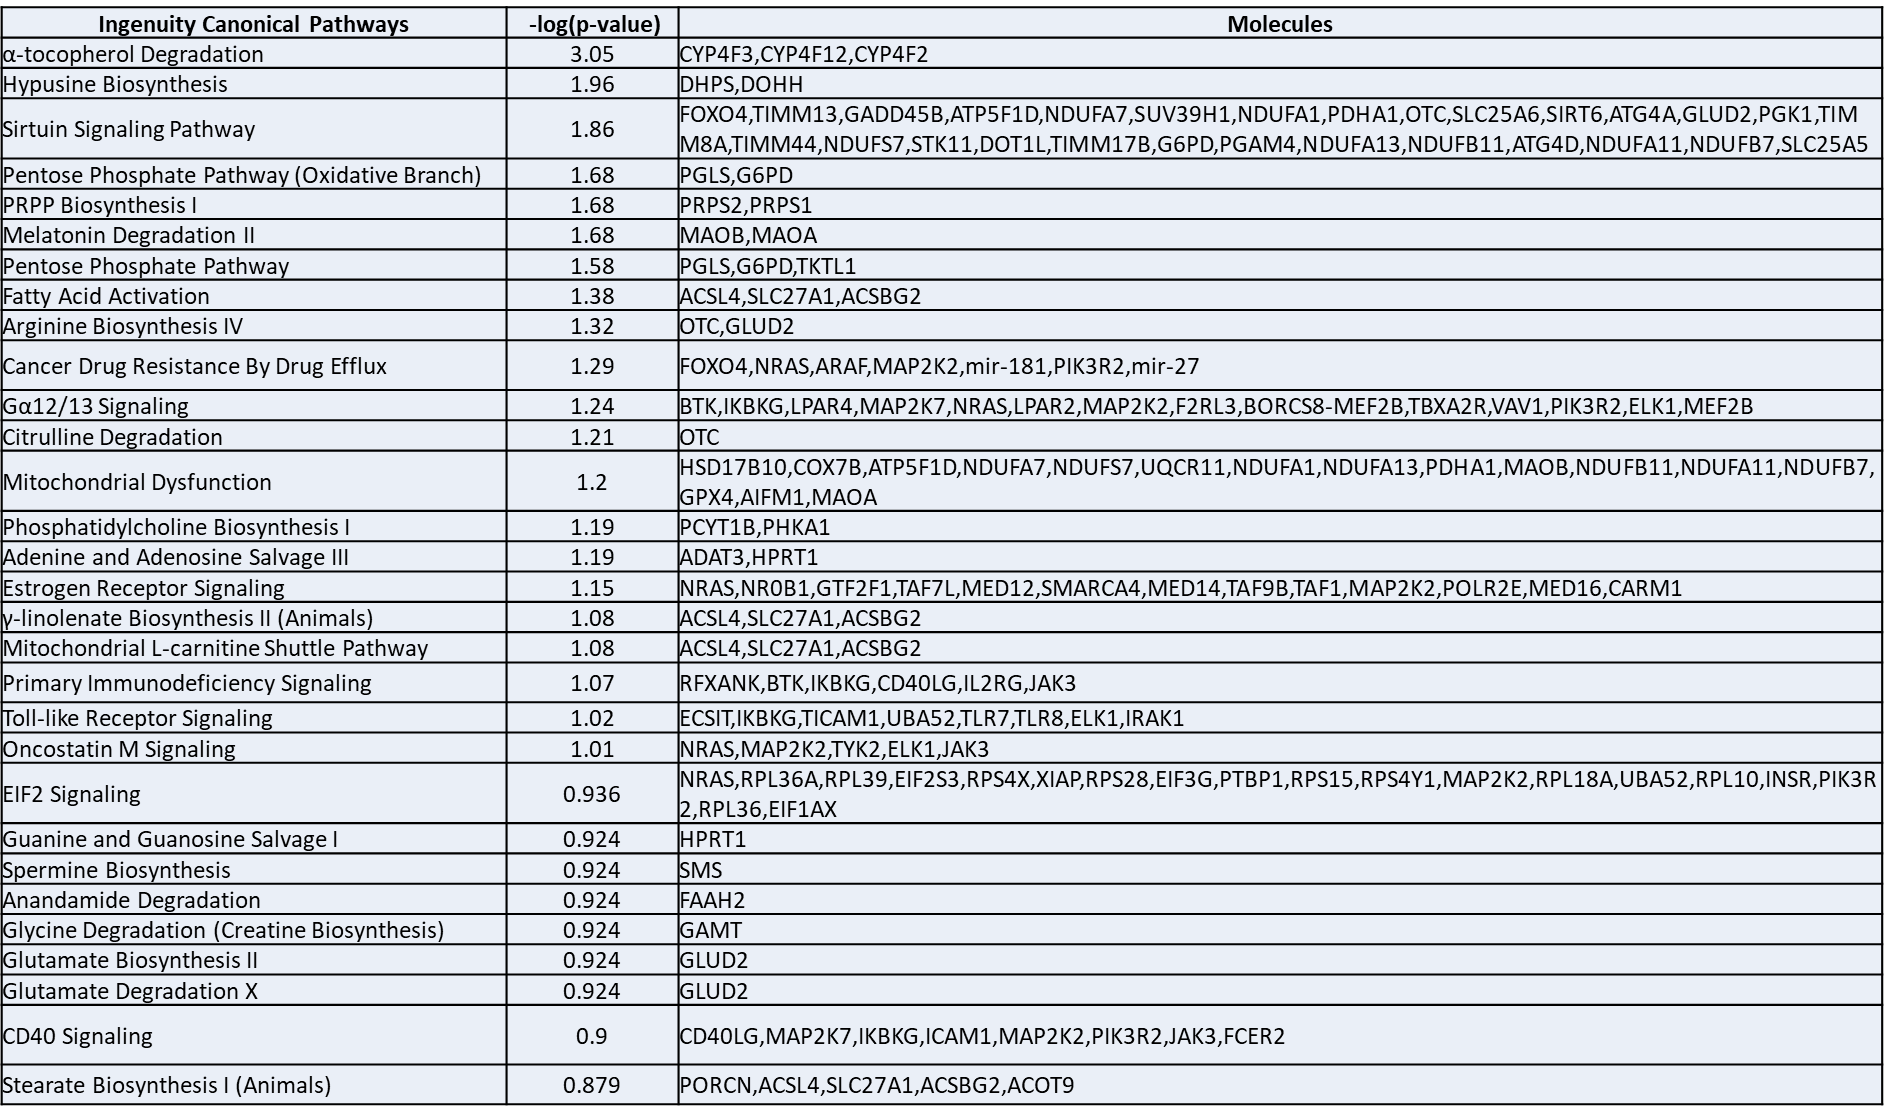


1. Progression (N=28), >40% cases had genomic gain


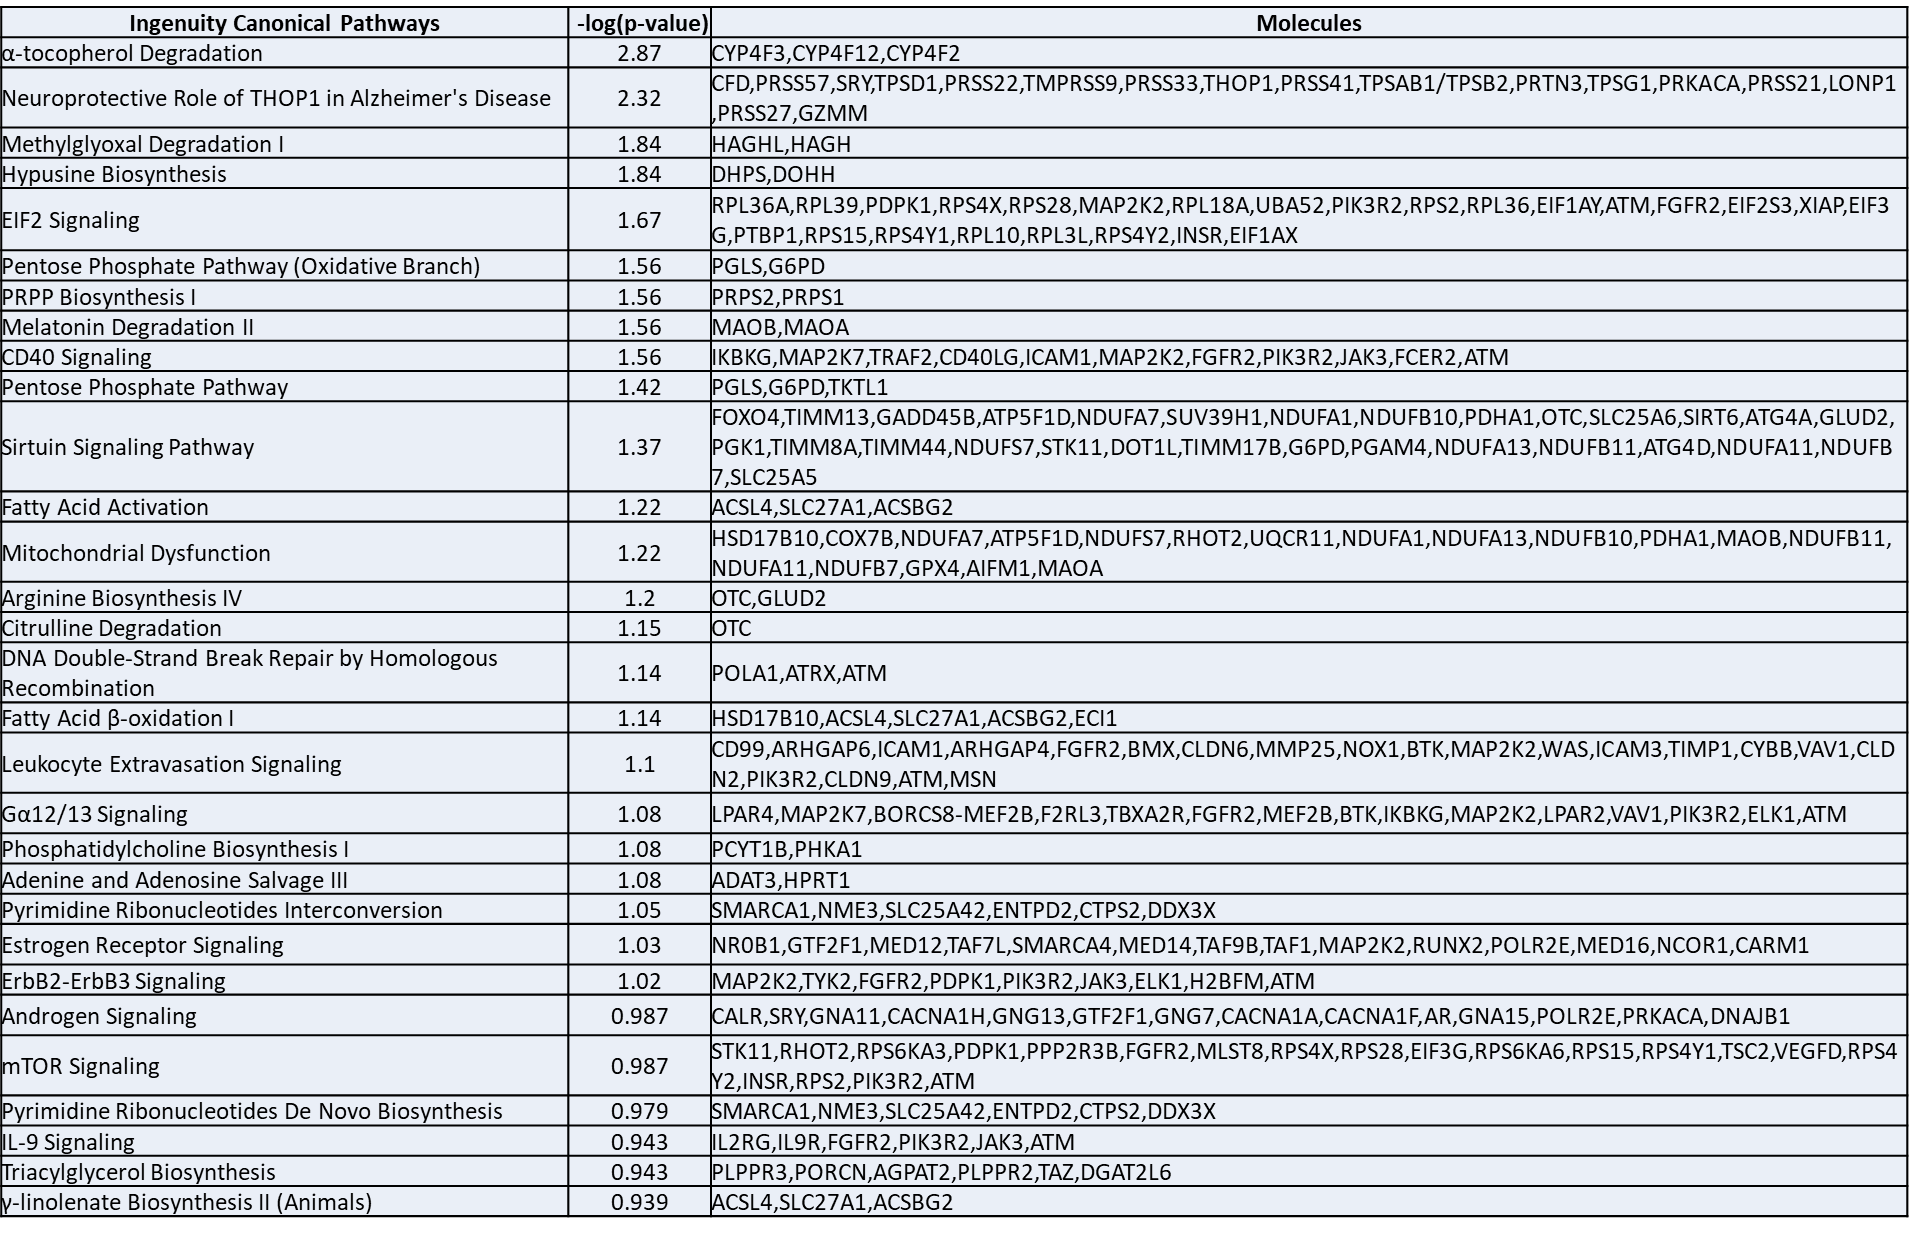

Supplement: 15417786mcr200975-sup-255188_2_supp_6926269_qynryt.docx [file 15417786mcr200975-sup-255188_2_supp_6926269_qynryt.docx]
